# Oligomycins Inhibit *Magnaporthe oryzae* *Triticum* and suppress wheat blast disease

Moutoshi Chakraborty<sup>1¶</sup>, Nur Uddin Mahmud<sup>1¶</sup>, Abu Naim Md. Muzahid<sup>1</sup>, S. M. Fajle Rabby<sup>1</sup>, Tofazzal Islam<sup>1\*</sup>

<sup>1</sup>Institute of Biotechnology and Genetic Engineering, Bangabandhu Sheikh Mujibur Rahman Agricultural University, Gazipur 1706, Bangladesh

<sup>¶</sup>These authors contributed equally to this work.

\*Corresponding author:

E-mail: tofazzalislam@yahoo.com

## Abstract

Oligomycins are macrolide antibiotics, produced by *Streptomyces* spp., show biological activities to several microorganisms like bacteria, fungi, nematodes and peronosporomycetes. Conidiogenesis, germination of conidia and formation of appressoria are crucial for a successful disease cycle and pathogenicity of the filamentous fungal phytopathogen. The goal of this research was to evaluate the effects of two oligomycins, oligomycin B and oligomycin F along with a commercial fungicide Nativo® 75WG on hyphal growth, conidiogenesis, conidia germination, appressoria formation, and disease development of a worrisome wheat blast fungus, *Magnaporthe oryzae* *Triticum* (*MoT*) pathotype. Both oligomycins suppressed the growth of *MoT* mycelia depending on the dose. Between the two natural products, oligomycin F displayed the maximum inhibition of *MoT* hyphal growth accompanied by oligomycin B with minimum inhibitory concentrations (MICs) of 0.005 and 0.05 µg/disk, respectively. The application of the

compounds also completely halted the conidia formation in the *MoT* mycelia in agar medium. A further bioassay showed that these compounds significantly inhibited *MoT* conidia germination and induced lysis; if germinated, induced abnormal germ tube and suppressed appressoria formation. Interestingly, the application of these macrolides significantly inhibited wheat blast disease on detached leaves of wheat. This is a first report on the inhibition of mycelial growth, process of conidia formation, germination of conidia, morphological changes in germinated conidia, and suppression of blast disease of wheat by oligomycins from *Streptomyces* spp. A further study is needed to evaluate the mode of action and field trials of these natural compounds to consider them as biopesticides for controlling this devastating wheat killer.

## Introduction

Oligomycins are macrolide antibiotics, produced by some strains of *Streptomyces* species. They have a broad-spectrum of biological activities to organisms like fungi, bacteria, nematodes and peronosporomycetes [1-4]. The *Streptomyces* spp. are common soil-dwelling bacteria, which have been broadly used as bio-control agents [5]. *Streptomyces* species produce a number of bioactive compounds, such as antifungal, antiviral, antibacterial, anticancer, nematocidal, and antioxidant properties [5, 6]. Several previous studies show that the effectiveness of some strains *Streptomyces* spp. in biological control of phytopathogens is largely related to the production of oligomycins [7]. The oligomycins are mitochondrial F1F0 ATP synthase inhibitors that cause apoptosis in a number of cell types [8]. The oligomycin complex which was first documented in 1954 in a strain of a soil bacterium, *S. diastatochromogenes* was highly inhibitory against fungi [1]. Antifungal, antitumor, insecticidal, immunosuppressive and nematocidal properties of oligomycins have been reported [1-3, 7, 9]. The oligomycins contain the analogs / isomers A

through G. Different isomers are highly selective for disrupting mitochondrial metabolism [3, 4, 8, 10]. Although the biological activities of oligomycins on fungi and peronosporomycetes have been reported, nothing is known about the effect of these natural products on a notorious wheat blast fungus *Magnaporthe oryzae Triticum* (*MoT*). The bioactivities of oligomycins to different classes of fungal species indicates that their targets may involve varieties of cellular processes, such as inhibition of mycelial growth of *Cladosporium cucumerinum*, *Magnaporthe grisea*, *Colletotrichum lagenarium*, *Botrytis cinerea*, *Cylindrocarpon destructans*, *Fusarium culmorum*, *Erysiphe graminis* and *Phytophthora capsici* [3, 11], lysis and motility inhibition of downy mildew zoospores (*Plasmopara viticola*) of grapevine, and inhibition of motility of zoospores of damping-off phytopathogen, *Aphanomyces cochlioides* [4].

The wheat blast fungus *MoT* is one of the most damaging pathogens of wheat [12-15]. The fungal three-celled, hyalin, pyriform conidium is bound to the host surface by an adhesive secreted from the tip of the conidium [14, 16, 17]. The conidium attached grow a germination to form a hyphal germ tube, an aspersorium and a penetration peg, which completes the infection by rupturing the cuticle, allowing it to penetrate the epidermis of the host [16, 18]. The invasion of plant tissue happens by bulbous hyphae invaginating the host plasma membrane and invading the epidermal cells [16-18]. The fungus can attack wheat plants at any stages of development and infects the aerial parts of wheat plants, including leaves, nodes, stems, and spikelets [15, 17, 19]. Mycelium can survive in embryo, endosperm, and kernal tissues of wheat seed. Wheat blast mainly affects wheat heads; it bleaches the infected heads, resulting deformed seed or no seed production [14]. The badly affected wheat head can die, leading to a drastic reduction in grain yield. Bleaching of spikelets and entire head at an early stage is perhaps the most common

recognizable symptom [12, 14, 15]. Infected seeds and airborne conidia usually transmit the disease, and the fungus may survive in infected seeds and crop residues [20]. Therefore, pyriform conidia developed from conidiophores and conidia germination with appressorial development at the germ tube tips are essential steps of the disease cycle of *MoT* [16]. Disrupting any of these asexual life stages reduces the chance of pathogenesis [21]. Finding of natural bioactive compounds inhibiting any of these phases of asexual life is considered to be the first step in the production of a new fungicide for *MoT*.

Wheat blast was first recorded in Brazil in 1985, and has been important locally since its introduction in Brazil, Bolivia and Paraguay [12, 19]. The cultivation of wheat (*Triticum aestivum*) was increased in Bangladesh, making it the 2<sup>nd</sup> largest food source after rice. In 2016, a sudden outbreak of wheat blast disease occurred in Bangladesh which was the first incident in any countries outside of South America [14, 22]. About 15,000 hectares of wheat crops have been destroyed, resulting in about 15% crop losses in Bangladesh [14]. The outbreak of wheat blast concerns crop scientists as it extends further to major wheat-producing regions in neighboring South Asian countries and Africa due to similar climatic conditions in such regions [23]. Plant pathologists have cautioned that this disease is expected to transmit to India, Pakistan and China, that are ranking 2<sup>nd</sup>, 8<sup>th</sup> and 1<sup>st</sup> in the world wheat production, respectively [15, 24].

Current wheat blast disease management methods include the utilization of synthetic fungicides. Most of the synthetic fungicides are harmful to the environment and health of living species including humans [25-26]. Indiscriminate application of synthetic commercial fungicides in plant protection results in resistance to fungicides [13, 17]. In Brazil and other South American

countries, some *MoT* strains showed resistance to these chemical arsenals due to the extensive use of strobilurin (QoI) and triazole fungicides [27, 28]. Nowadays, natural products that are environment-friendly and have minute toxicity to living organisms are gaining popularity as important sources for producing ecologically suited alternative fungicides for protecting plants. Therefore, search for novel bioactive natural products against *MoT* is needed.

The biological approach for the plant disease management offers a better alternative to the control of wheat blast disease owing to its safety for human use and the environment. So far, no report has been demonstrated on the antagonistic impacts of *Streptomyces* spp., and/or their secondary metabolites to control wheat blast disease. We screened 150 natural compounds belonging to the class alkaloids, terpenoids, macrolides, macrotetrolides, tepenoids, and phenolics isolated from different plants and microorganisms on mycelial growth and asexual development of wheat blast fungus *MoT* in our laboratory [21]. Among them, two macrolides, oligomycin B and oligomycin F, previously extracted from the marine *Streptomyces* spp. [3-4] displayed very strong inhibitory effects against *MoT* both *in vitro* and *in vivo*. This is known to be the first report of the bio-control of the notorious wheat blast disease by some macrolides from the *Streptomyces* spp. The specific objectives of this study were to: (i) test the effects of oligomycins B and F on mycelial growth of *MoT*; (ii) examine the effects of these macrolides on conidiogenesis, conidia germination and their subsequent morphological transitions in sterilized water medium; and (iii) evaluate the effects of these macrolides on the suppression of the development of wheat blast disease in the detached wheat leaves.

# Materials and methods

## Chemicals

Oligomycin B and oligomycin F (Fig. 1) were isolated from the marine bacteria, *Streptomyces* sp. strains B8496, B8739 and A171 [3-4]. These compounds were generously provided by Dr. Hartmut Laatsch of Georg-August University Goettingen, Germany. Fungicide Nativo® WG 75 was purchased from Bayer Crop Science Ltd.

## Fungal strain, media and plant materials

The strain BTJP 4 (5) of *MoT* was isolated from the spikelets of wheat cv. BARI Gom-24 (Prodip) with blast infection, which was collected from a highly infected field in Jhenaidah, Bangladesh in 2016. The isolated strain was conserved at 4°C on dry filter paper before used in the present research (Islam et al., 2016). It was re-cultured on the PDA (Potato Dextrose Agar 42 g/L) medium and incubated at 25°C for 7-8 days. After placing a small block of *M. Oryzae Triticum* (*MoT*) pathotype isolate BTJP 4 (5) in the above-mentioned medium, the plate was incubated at 25°C [14].

For sporulation, 10-days-old fungal cultures grown on PDA medium were washed with 500 ml of deionized distilled water for removing aerial mycelia and then kept at room temperature (25-30°C) for 2-3 days [14, 29]. The conidial and mycelial suspensions were filtered by two layers of cheese cloth and adjusted to a concentration of  $1 \times 10^5$  conidia/ml. Conidia were collected and

put in water. Conidial germination was visualized under a microscope and germinated conidia numbers were counted. BARI Gom-24 (Prodip) wheat cultivar which is susceptible to *MoT*, was used for the disease suppression bioassay. Wheat leaves were separated from the seedlings of five-leaf stage for bioassay of *in vivo* disease suppression [30].

## **Mycelial growth inhibition by oligomycins**

The *in vitro* antifungal efficacy of pure oligomycins and commercial fungicide, Nativo ® WG 75, were evaluated on the basis of the hyphal growth inhibition rate of *MoT* isolate BTJP 4 (5) by the modified Kirby – Bauer disk diffusion technique [31]. A series of concentrations of both the natural compounds were prepared in ethyl acetate. However, Nativo ® WG75 was added in distilled water to make fungicidal solution. Nine-millimeter diameter of filter-paper disks (Sigma-Aldrich Co., St. Louis, MO, USA) were filled with bioactive compound suspensions at concentrations ranging from 0.005 to 2 µg / disk. Paper disks were placed on one side of the Petri dish (2 cm from the edge) comprising of 20 ml of PDA. Five millimeter diameter mycelial plugs from seven-days-old PDA cultures of *MoT* were mounted on the opposite side of Petri dishes (9 cm diameter) perpendicular to paper disk. As a positive control, Petri dishes inoculated with fungal mycelia plugs against fungicide Nativo ® WG75 were used, while fungal colonies were used as a negative control without any treatment. The minimal inhibitory concentration (MIC) of oligomycin B and F was also measured. After 10 days, the antimicrobial activity was shown by the diameter of growth inhibition zones. For each concentration used, the experiment was replicated five times. Plates were incubated at 25°C until fungal mycelia fully covered the agar surface of control plate. The fungal colony's radial growth was measured in centimeter (cm) with

a meter ruler along with two diagonal lines drawn on each plate's opposite side. Data were recorded by the measurement of pathogen inhibition zone and mycelial growth, and the percentage of inhibition of radial growth (PIRG) ( $\pm$  standard error) [32] was calculated from mean values as:

$$\text{PIRG (\%)} = \frac{\text{Radial growth of control} - \text{Radial growth of treatment}}{\text{Radial growth of control}} \times 100$$

Hyphal morphologies in the vicinity of compounds were observed under a ZEISS Primo Star microscope at 40x and 100x magnification. Images of inhibition zone were captured through a digital camera (Canon DOS 700D) and images of morphologies of hyphae were recorded by a microscopic camera (ZEISS Axiocam ERc 5s).

## Conidiogenesis inhibition by oligomycins

The stock solution of each oligomycin was prepared in 10  $\mu$ l of dimethyl sulfoxide (DMSO). Each compound solution was then made ready in distilled water at concentrations of 5, 10 and 100  $\mu$ g / ml. The final concentration of DMSO was never higher than 1% (v / v) for the working solution, which does not affect the hyphal growth or sporulation of *MoT*. Preparation of 5 ml fungicidal suspension of Nativio®WG75 was carried out in distilled water (5, 10 and 100  $\mu$ g/ml) for using as a positive control. For conidia formation (i.e., conidiogenesis) observation, mycelia were washed out from the Petri dish of 10-days-old PDA culture of *MoT* for reducing nutrient to induce conidiogenesis in the fungal mycelia [14, 29]. Exactly 50  $\mu$ l of each compound and Nativio®WG75 were exerted on the 10 mm *MoT* mycelial agar block at 5, 10 and 100  $\mu$ g/ml put in Nunc multidish (Nunc). Only sterilized water was exerted on the *MoT* fungal mycelial agar block with 1% DMSO which used as negative control. Dishes with mycelial agar blocks of *MoT*



fungus were incubated at 28°C with optimum humidity and lights. Formation of conidia was visualized under a ZEISS Primo Star microscope at 40x magnification after 24 h, and the images were captured with a microscopic camera (ZEISS Axiocam ERc 5s). The experiment was replicated five times, and five replications were performed each time.

## **Conidial germination inhibition and morphological changes of germinated conidia by oligomycins**

Preparation of stock solution of each oligomycin (0.1 µg) was done in 10 µl of dimethyl sulfoxide (DMSO). Exactly 0.1 µg/ml concentration of each compound was then achieved by adding distilled water. Nativo®WG75 solution was prepared with distilled water at 0.1 µg/ml which served as a positive control. The conidia germination bioassays were carried out by following the protocol of Islam and von Tiedemann [33]. Briefly, 100 µl from 0.1 µg/ml sample solution was added directly to 100 µl conidial solution ( $1 \times 10^5$  conidia) of *MoT* to make a final volume of 200 µl (0.05 µg/ml sample solution) which poured into a well of a plant tissue culture multi-well plate. Afterwards, the solution was quickly mixed with a glass rod and incubated at 25°C. The presence of ≤1% DMSO in the conidial suspension was maintained to avoid any effect on conidial germination or further developments of the germinated conidia. Sterilized water was used as control with 1% DMSO. The multidish containing conidial sample solution in wells was incubated in a moisture chamber at 25 °C for 6 h, 12 h and 24 h without the provision of light. A total of 100 conidia from each of five replicates were examined under bright field microscope (ZEISS Primo Star, Germany) at 100x magnification to evaluate the percentage of conidial germination and major developmental transitions of the treated conidia, and the pictures were captured with a microscopic camera (ZEISS Axiocam ERc 5s). The experiment was

performed five times and each time it was repeated in five replications. In time wise microscopic observation, the treatments of conidia with tested compounds likely result in germination, no germination, alteration of the morphology of germ tubes, appressoria and/or mycelial growth. The percentage of conidia germination ( $\pm$  standard error) was calculated from mean values as:  $CG \% = (C - T)/C \times 100$ ; Where, CG = conidial germination, C = percentage of germinated conidia in control, and T = percentage of germinated conidia in sample. Same calculation was used for other conditions mentioned.

## **Suppression of wheat blast disease on detached leaves by oligomycins**

As stated earlier, stock solutions of oligomycins B and F were prepared using dimethyl sulfoxide (DMSO). Then preparation of 5, 10 and 100  $\mu\text{g/ml}$  concentrations of each compound was carried out in distilled water where the final DMSO concentration never exceeded 1%. Different concentrations (5, 10 and 100  $\mu\text{g/ml}$ ) of Nativo®WG75 were served as positive control. Sterilized water was applied as negative control with 1% DMSO. From the five-leaf stage seedlings, wheat leaves were separated and introduced in plates lined with moist absorbent paper. Three 20- $\mu\text{L}$  droplets of the formulated compounds were then inoculated on each leaf. Afterwards, the leaves were permitted to absorb the compounds for 15 minutes. Consequently,  $1 \times 10^5$  *MoT* conidia were introduced onto the leaf surface. With 100% relative humidity, each of the dishes was incubated at 28 °C, first 30 h in dark condition, then 2 days in continuous light condition. The test was performed five times independently. The wheat blast lesions diameter was measured from 12 leaves per experiment.

## Statistical analysis, experimental design/replications

Experiments were performed using a complete randomized design (CRD) to determine the biological activities of the pure compounds. Data were evaluated by a one-way variance analysis (ANOVA), and the mean values were distinguished by the posthoc statistic of Tukey's HSD (honest significant difference). All the statistical analyses were carried out by using SPSS (IBM SPSS statistics 16, Georgia, USA) and Microsoft Office Excel 2010 program package. Mean value  $\pm$  standard error of 5 replications were used in Tables and Figures.

## Results

### Oligomycins inhibit mycelial growth and induce alterations in hyphal morphology of *MoT*

150 secondary metabolites of several plants and micro-organisms have been evaluated to find out whether the natural products inhibit *MoT* fungal (Chakraborty et al. 2020). Among these natural compounds evaluated, two oligomycins (B and F) (Fig 1) extracted from the *Streptomyces* spp. showed significant hyphal growth inhibitory activities against *MoT* fungus in the PDA medium. Fig 2 demonstrates the inhibition of *MoT* hyphal growth by the tested oligomycins. Between these two compounds, oligomycin F depicted the strongest mycelial growth inhibitory activity against the isolate BTJP 4 (5) of *MoT*. The highest *MoT* hyphal growth inhibition was observed by oligomycin F followed by oligomycin B. Both compounds demonstrated potency on the tested phytopathogen ranging from  $57.1 \pm 1.3\%$  to  $73.9 \pm 2.5\%$  at 2  $\mu\text{g}/\text{disk}$  (Fig 3). The

activities of these macrolides were compared with that of the commercial fungicide used in the field, Nativo® WG 75 whose control percentage was  $81.9 \pm 0.9\%$  (at 2  $\mu\text{g}$ / disk).

**Fig 1. Structure of macrolides isolated from *Streptomyces* spp. tested toward *M. oryzae Triticum* (MoT)** (Dame et al., 2016)

**Fig 2. Macroscopic and microscopic view of *in vitro* antifungal activity of oligomycin B, oligomycin F and a commercial fungicide nativo® WG75 against *M. oryzae Triticum* (MoT) at 2  $\mu\text{g}$ /disk.** (a) Control, (b) Oligomycin B, (c) Oligomycin F, (d) Nativo® WG75. Bar = 50  $\mu\text{m}$ .

**Fig 3. Inhibitory effects of oligomycin B, oligomycin F and a commercial fungicide nativo® WG75 on hyphal growth of *M. oryzae Triticum* (MoT) in PDA media.** The data are the mean  $\pm$  standard errors of five replicates for each dose of the compound tested at a 5 % level based on the Tukey HSD (Honest Significance Difference) post-hoc statistic.

All the macrolides inhibited MoT's mycelial growth, though the strength varied. With the increase in oligomycin concentration the suppressive consequences increased from 0.005 to 2  $\mu\text{g}$ /disk (Fig. 3). Neither of the macrolides, however, showed any activity against MoT at concentration lower than 0.005  $\mu\text{g}$ /disk. Oligomycin F showed extensive inhibition of the pathogen at 2  $\mu\text{g}$ /disk ( $73.9 \pm 2.5\%$ ) followed by 1.5  $\mu\text{g}$ /disk ( $67.6 \pm 0.9\%$ ) and 1  $\mu\text{g}$ /disk ( $60.9 \pm 2.5\%$ ). The suppression percentage of oligomycin B were  $57.1 \pm 1.3\%$ ,  $54.3 \pm 1.3\%$  and  $53.3 \pm 1.5\%$ , at 2, 1.5 and 1  $\mu\text{g}$ /disk, respectively. Minimum inhibitory concentrations (MICs) of oligomycin F and oligomycin B 0.005 and 0.05  $\mu\text{g}$ /disk (Fig 4) were also able to inhibit hyphal growth at  $11.4 \pm 2.3\%$  and  $8.63 \pm 1.3\%$ , respectively. Compared to these macrolides, minimal

inhibitory concentration of Nativo was 0.05 µg/disk (Fig 4). At varying concentrations, the mycelial growth inhibitory activities of these macrolides similar and sometime significantly stronger than fungicide Nativo® WG 75. Oligomycin F displayed inhibitory activity against *MoT* about 10-fold lower concentration than those of Nativo® WG 75 and oligomycin B.

**Fig 4. Minimal Inhibitory Concentration (MIC) values of oligomycin B, oligomycin F and a commercial fungicide nativo® WG75 on hyphal growth of *M. oryzae Triticum* (*MoT*) in PDA medium.**

Microscopic studies depicted that the untreated *MoT* hyphae had polar and tubular growth with smooth, branched, hyaline, plump, septate, and intact hyphae (Fig 2a). On the other hand, the morphology of hyphae treated with natural macrolides was apparently different from the normal hyphae of control. In contrast to the control group tubular hyphae, a noteworthy increase in branch frequency per unit length of hyphae, destruction of regular growth with twisted ridges and corrugations, and irregular swelling of hyphal cells were found when *MoT* was treated with oligomycins (Fig 2b and 2c). The *MoT* hyphae showed crystal appearance, loss of polar growth, erratic branching and swelling with twisted ridges and corrugations in the vicinity of Nativo ® WG75 (Fig 2d). Morphological changes of *MoT* by two oligomycins were different from those occurred by the effect of commercial fungicide, Nativo®WG75

## Oligomycins suppressed conidiogenesis in *MoT*

We also tested whether the oligomycins (B and F) have an effect on the process of conidia production called conidiogenesis from the *MoT* mycelia. Conidiogenesis of *MoT* was inhibited by both the compounds. Huge conidia formation was found in the hyphal agar block of negative control after 24 h of incubation (Fig 5a). In the hyphal agar block of positive control, conidiogenesis inhibited in decreasing manner at 5, 10 and 100 µg/ml (Fig 5d). Compared to negative control, conidia formation was remarkably decreased by the oligomycins at 5 and 10 µg/ml concentrations (Fig 5b and 5c). Both the compounds and the positive control Nativo®WG75 completely blocked conidiogenesis at 100 µg/ml (Fig 5b and 5c). Moreover, microscopic findings demonstrated the existence of broken mycelial tips with no sign of conidiophore and conidial growth on the surface of the agar medium treated with macrolides at 100 µg / ml.

**Fig 5. Effects of oligomycin B, oligomycin F and a commercial fungicide Nativo® WG75 on the inhibition of conidiogenesis of *M. oryzae Triticum* (*MoT*) in Nunc multidish at 5 µg/ml, 10 µg/ml, 100 µg/ml. (a) Control, (b) Oligomycin B, (c) Oligomycin F, (d) Nativo® WG75. Bar = 50 µm.**

## Inhibitory effects of oligomycins on conidial germination of *MoT*

Oligomycin B and oligomycin F at 0.05 µg / ml were used to determine the inhibition of conidial germination of *MoT* in a multi-well plates. After 6 h of incubation percentage of conidial

germination was recorded (Table 1). Conidial germination was 100% in water, but conidial germination was 50.3±0.7% in the case of Nativo ® WG75. Both macrolides, oligomycin B and F significantly inhibited the germination of *MoT* conidia. Between the macrolides, oligomycin B showed the lowest conidial germination (24 ± 0.9%) compared to oligomycin F (53±0.4%) at 0.05 µg/ml.

**Table 1. Effects of oligomycin B and oligomycin F on germination of conidia and their subsequent developmental transitions of *Magnaporthe oryzae Triticum (MoT)* at the dose of 0.05 µg/ml *in vitro***

| Compound     | Time (h) | Effects of natural macrolides on the developmental transitions of conidia of wheat blast fungus <i>M. oryzae Triticum (MoT)</i> |                                                                                         |
|--------------|----------|---------------------------------------------------------------------------------------------------------------------------------|-----------------------------------------------------------------------------------------|
|              |          | Germinated conidia (% ± SE <sup>a</sup> )                                                                                       | Major morphological change/developmental transitions in the treated conidia             |
| Water        | 0        | 0 ± 0e                                                                                                                          | No germination                                                                          |
|              | 6        | 100 ± 0a                                                                                                                        | Germinated with normal germ tube and normal appressoria developed                       |
|              | 12       | 100 ± 0a                                                                                                                        | Mycelial growth took place                                                              |
|              | 24       | 100 ± 0a                                                                                                                        | Huge mycelial growth took place                                                         |
| Oligomycin B | 0        | 0 ± 0e                                                                                                                          | No germination                                                                          |
|              | 6        | 38.3 ± 0.7d                                                                                                                     | 24 ± 0.9% Germinated with a short germ tube and 14.3± 0.7% conidia lysed                |
|              | 12       | 24 ± 0.9d                                                                                                                       | 10.6 ± 0.7% Normal, 8.4 ± 0.2% short and 5 ± 0.4% abnormally elongated germ tube formed |
|              | 24       | 0 ± 0b                                                                                                                          | No appressoria formed, no mycelial growth took place                                    |
| Oligomycin F | 0        | 0 ± 0e                                                                                                                          | No germination                                                                          |
|              | 6        | 59 ± 0.8b                                                                                                                       | 53 ± 0.4% Germinated with a short germ tube and 6 ± 0.8% conidia lysed                  |
|              | 12       | 53 ± 0.4b                                                                                                                       | 33.3 ± 0.5% Normal and 19.7 ± 0.2% abnormal branching at the tips of germ tubes         |
|              | 24       | 0 ± 0b                                                                                                                          | No appressoria formed, no mycelial growth took place                                    |

|        |    |             |                                                      |
|--------|----|-------------|------------------------------------------------------|
| Nativo | 0  | 0 ± 0e      | No germination                                       |
|        | 6  | 50.3 ± 0.7c | Germinated with a short germ tube                    |
|        | 12 | 50.3 ± 0.7c | Normal germ tube formed                              |
|        | 24 | 0 ± 0b      | No appressoria formed; no mycelial growth took place |

<sup>a</sup> The data presented here are the mean value ± SE of three replicates in each compound. Means within the column followed by the same letter(s) are not significantly different from those assessed by Tukey's HSD (Honest Significance Difference) post-hoc ( $p \leq 0.05$ ).

## Developmental transitions of the treated conidia of *MoT* by oligomycins

After 24 h of incubation at 25°C in darkness, conidial germination with normal germ tube development and mycelial growth was 100% in water at 6 h, 12 h and 24 h of incubation, respectively (Table 1, Fig 6a). The impact of the two oligomycins on the conidia's further development differed with time, and abnormal developmental transitions were also found by these natural compounds at 0.05 µg/ml. In case of oligomycin B, 24 ± 0.9% conidial germination took place and 14.3 ± 0.7% conidia lysis observed after 6 h. At 24 h after treatment, 10.6 ± 0.7% normal, 8.4 ± 0.2% short and 5 ± 0.4% abnormally elongated germ tubes formation observed among the germinated conidia, without progressing appressorial development and mycelial growth after 24 h (Table 1, Fig 6b). In the presence of oligomycin F, 53 ± 0.4% conidia germinated with shorter germ tube and 6 ± 0.8% conidia lysed after 6 h. Among the germinated conidia, 33.3 ± 0.5% normal and 19.7 ± 0.2% abnormally branched germ tube formation took place after 12 h, but no appressoria formation and mycelial growth recorded after 24 h (Table 1, Fig 6c). Nativo induced 50.3 ± 0.7% conidial germination with 50.3 ± 0.7% normal germ tube



formation after 6h and 12 h, but inhibited 100% appressoria formation and mycelial growth (Table 1, Fig 6d). The findings revealed that the two macrolides induced major germ tube malformation and suppressed formation of appressoria and hyphal growth of *M. oryzae Triticum*. No conidial malformation was found in case of Nativo®WG75, but a slower growth of germ tubes was observed (Fig 6d).

**Fig 6. Time-wise alterations in *M. oryzae Triticum* (*MoT*) conidia germination and their morphological changes in the presence of oligomycin B, oligomycin F and a commercial fungicide Nativo® WG75.** Dose of oligomycins was 0.05 µg/ml. (a) Control, (b) Oligomycin B, (c) Oligomycin F, (d) Nativo® WG75. Bar = 10 µm.

## Wheat blast disease suppression by oligomycins

Application of these macrolides at the doses of 5, 10 and 100 µg/ml remarkably inhibited symptoms of wheat blast in detached wheat leaves which were inoculated with *MoT* conidia. The average length of lesions recorded in the wheat leaves treated with oligomycin B were  $6.3 \pm 0.3$  mm and  $1.8 \pm 0.3$  mm at 5µg/ml and 10 µg/ml, respectively (Fig 7A and 7B). In case of oligomycin F and Nativo®WG75, recorded blast lesion lengths were  $4 \pm 0.3$  mm and  $2 \pm 0.3$  mm at 5 µg/ml (Fig. 7A, B). No visible disease symptoms were observed on the leaves when treated with oligomycin F and the positive control Nativo®WG75 at 10 µg/ml and 100 µg/ml (Fig 7A and 7B). Oligomycin B completely inhibited blast lesion formation at 100 µg/ml. These results show that the development of wheat blast on detached wheat leaves was substantially inhibited by all the natural compounds but at varying doses. On the other side, un-inoculated negative

control plants with water treatment had typical blast disease lesions of  $9.58 \pm 0.2$  mm in length (Fig 7A, 7B).

# **Fig 7. Effects of oligomycins on the suppression of lesion formation in detached wheat**

**leaves by *M. oryzae Triticum* at 5 µg/ml, 10 µg/ml and 100 µg/ml. (A) blast lesion symptoms on treated and untreated wheat leaves (a) Control, (b) Oligomycin B, (c) Oligomycin F, (d) Nativo® WG75, (e) Healthy leaf; (B) diameter of lesions were measured.** Bars represent  $\pm$  standard error. Mean value of control is same for all the chemicals. The data are the averages  $\pm$  standard errors of at least five replicates for each dose of the tested compounds at  $p \leq 0.05$ .

## **Discussion**

In this study, we found that two macrolides, oligomycin B and oligomycin F, isolated from *Streptomyces* spp. demonstrated extensive antifungal activities against a devastating blast pathogen of wheat, *M. oryzae Triticum* (MoT). Bioassay depicted that both the compounds strongly suppressed mycelial growth as well as conidiogenesis, germination of conidia and morphological changes of the germinated conidia. These natural compounds inhibited wheat blast disease in detached leaves of wheat. The biological activities of the oligomycin F was even stronger than the commercial fungicide Nativo® WG75. Taken together, these findings indicate that suppression of mycelial growth and conidial germination by these macrolides is correlated with wheat blast disease inhibition following inoculation of the leaves. Hyphal growth Inhibition, conidia formation and germination of conidia of various fungi, such as rice blast fungus (MoO) by a number of natural secondary metabolites on *in vitro* bioassay have been documented by

earlier investigators [3, 11, 34-39]. This is a first report of managing the devastating wheat blast fungus by oligomycin B and F isolated from the *Streptomyces* spp. Oligomycins are macrolide antibiotics that block the proton channel (F0 subunit) requisite for the oxidative phosphorylation of ADP to ATP to inhibit ATP synthase. [40]. While oligomycins have excellent biological properties, only a limited studies have so far focused on their development as plant defense agents. Furthermore, this is also a first report on the inhibition of the wheat killer fungus *MoT* by two macrolide antibiotics, oligomycin B and F from *Streptomyces* spp. Interestingly, the potency of oligomycin F in controlling wheat blast fungus was 10-fold stronger than the commercial fungicide Nativo® WG75.

One of the striking findings in this present study is the swelling inducing by these macrolides on the hyphae of *MoT* (Fig 2b and 2c). We tested a range of concentrations from 0.005 to 2 µg /disk. Swelling in hyphae increased with increasing concentrations of the oligomycins. Swelling in the fungal hyphae has been reported earlier by polyoxin B [41], fengycin [37-39] and tensin [42]. Morphological changes like extensive branching and swelling of hyphae of an oomycete pathogen *Aphanomyces cochlioides* by phloroglucinols extracted from *Pseudomonas fluorescence* or xanthobaccin A isolated from *Lysobacter* sp. SB-K88 have been documented [43-46]. According to a report of Kim et al. [11], oligomycin A from *Streptomyces libani*, significantly inhibited mycelial growth of *Magnaporthe grisea*, *Botrytis cinerea*, *Colletotrichum lagenarium*, *Cylindrocarpon destructans*, *Cladosporium cucumerinum* and *Phytophthora capsici*. So far, this is a first report on swollen-like structures development in hyphae by oligomycins toward the most destructive phytopathogen, *MoT*. A further investigation is needed to understand the mode of action of these macrolides toward the worrisome phytopathogen *MoT*.

406 Conidia is the medium by which most pathogenic fungi infect plants and the process by which  
 407 conidia are formed is known as conidiogenesis [35, 47]. Destruction of conidiogenesis and  
 408 inhibition of conidial germination reduce the chance of fungal phytopathogen infection. Another  
 409 interesting finding of this study is that both oligomycin B and F strongly suppressed  
 410 conidiogenesis (Fig 5), germination of conidia and major morphological changes of conidia  
 411 (Table 1, Fig 6). Bioassay findings showed that previously treated wheat leaves with these  
 412 macrolides at 5, 10 and 100 µg/ml, resulting in the leaves were less appealing to *MoT* conidia.  
 413 Others novel phenomena observed in the *MoT* conidia interacting with these macrolides include  
 414 the dynamics of the lysis of conidia, irregular branching at the tip of germinated conidial germ  
 415 tube, and abnormally elongated hypha-like germ tube (Fig 6b and 6c). Similar phenomenon was  
 416 observed by Dame et al. [4] who reported that oligomycin A, B and F from a marine  
 417 *Streptomyces* can induce lysis of zoospores of a pathogen *Plasmopara viticola* of grapevine  
 418 downy mildew. Homma et al. [48] reported that, lecithin induces abnormal branching at the  
 419 conidial germ tube tips and inhibits appressoria formation of rice blast fungus. Islam and  
 420 Fukushi [46] have observed that cystospores of *A. cochlioides* produced in the presence of  
 421 diacylphloroglucinol (DAPG) germinated with hyperbranched germ tubes. Carver et al. [49]  
 422 found that when conidia of *Blumeria graminis* germinated within established oat mildew  
 423 colonies, most of them developed abnormally elongated hypha-like germ tubes, resulting in no  
 424 development of appressoria and were unable to attempt invasion. Inhibition of conidiogenesis,  
 425 germination and formation of appressoria of the *MoT* conidia by the effects of oligomycins has  
 426 not been reported. These compounds might influence gene expression upstream of melanin  
 427 synthesis and block intracellular signaling or signal transduction pathways which regulate  
 428 appressoria formation [50]. The effect of these bioactive natural compounds on the expression

of germination of conidia and formation of appressorium related genes in *MoT* will also be focused in future study.

The ATPase has recently appeared as a promising molecular target for developing new therapeutic options for a variety of diseases. The ATP synthase is thought to be one of the oldest and most conserved enzymes in the molecular world and has a complex structure with the probability of inhibition by a range of inhibitors [51]. It is of great scientific concern that oligomycins are macrolide antibiotics that impede ATP production by influencing oxidative phosphorylation in mitochondria [52]. Oligomycin comprises a 26-membered  $\alpha$ ,  $\beta$ -unsaturated lactone with a conjugated diene fused to a bicyclic spiroketal ring system. Their mode of action includes the decoupling of mitochondrial ATPase F<sub>0</sub> and F<sub>1</sub> factors responsible for promoting the transfer of proton via the inner mitochondrial membrane [53]. The enzymatic complex F<sub>0</sub>F<sub>1</sub> ATP synthase may be considered as a target for antifungal and anti-tumor or anti-infection therapy [54]. Oligomycins display a number of important biological activities including mitochondrial ATPase inhibition, strong antifungal, anti-actinobacterial and anti-tumor effects have been reported [9, 1, 54]. These natural products are among the strongest selective agents in the cell line; they interrupt P-glycoprotein activity and induce apoptosis in doxorubicin-resistant HepG2 cells [55]. Oligomycins have a variety of isomers called oligomycin A through G. These are particularly relevant to the disruption of mitochondrial metabolism [10]. Moreover, elucidation of structure has provided new horizons for developing new ATP synthase-directed agents with possible therapeutic effects [51]. The first reports of chemical modification of oligomycin A have already been documented by Lysenkova et al. [56]. New compounds have also showed efficacy against *Candida albicans*, *Aspergillus niger* and *Cryptococcus humicolus*, and their other biological properties are similar to those of oligomycin A, but with less cytotoxic

effects. During germination, conidia might need a constant energy (ATP) supply from the internal energy reserve of the cells [57]. It is therefore rational to suppose that the suppression of hyphal growth and conidia germination of *MoT* depicted in this study is likely to be associated with the ATP synthesis inhibition in mitochondria due to the effects of oligomycins. While structural-activity relationships have not been established in the case of these metabolites, more studies are required to determine the precise structure-activity relationships of these oligomycins, which will make it possible to synthesize a more active oligomycin that could be an effective agrochemical against *MoT*.

A hallmark of the findings of this study is that the application of both the macrolides significantly inhibited blast disease development in detached leaves of wheat (Fig 7). In this analysis, the leaves of wheat treated with oligomycin B and F had comparatively shorter lesion lengths than the untreated control (Fig 7). Many of the lesions were small, brown, with pinhead-sized specks (scale 1) to small, roundish to slightly elongated blast lesions infecting <10% of wheat leaf area (scale 5). In contrast, the control wheat leaves had typical blast lesions infecting 26-50% wheat leaf area (scale 7) as per the 9-scale blast disease assessment provided by the IRRI Standard Evaluation System [58]. However, no visible blast lesions were found in the presence of all the compounds and the positive control Nativo ® WG75 at the highest treated concentration (Fig 7). Nativo ® WG75 is a systemic wide-spectrum commercial fungicide that we used as a positive control. Interestingly, the antifungal effect of oligomycins on the inhibition of *MoT* fungus is even equivalent or stronger to that of this fungicide. Tebuconazole and trifloxystrobin are two main active ingredients of Nativo ® WG75. Tebuconazole is known as a dimethylase inhibitor (DMI), which is a systemic triazole fungicide. This interacts with sterol biosynthesis in fungal cell walls and suppresses spore germination and further development of

the fungus [59]. Trifloxystrobin is a strobilurin fungicide that interferes with the respiration of plant pathogenic fungi by preventing electron transmission in mitochondria, disrupting metabolic processes and inhibiting the development of target fungi [60]. The mechanism of disease suppression by the oligomycins might be uniquely different from the Nativo® WG75. A further study is needed to elucidate the underlying mechanism of wheat blast disease suppression by the oligomycin B and F. Furthermore, a field trial of the oligomycins in controlling wheat head infection is needed before considering them as effective fungicides against the wheat blast.

Despite the significant potency of an antifungal antibiotic, little has been reported about the effectiveness of oligomycins as agricultural fungicides. The shorter residual effect of oligomycin can be important in the reduction of deleterious effects on humans and the environment, considering that sufficient efficacy in the management of plant diseases is sustained [11]. In the *in vivo* experiments for the protection efficacy against plant diseases such as *Phytophthora* blight in pepper plants, anthracnose in cucumber leaves, and leaf blast in rice, oligomycin A demonstrated substantially defensive activity against certain plant pathogen infections in host plants treated with 500 µg/mL. Defense activity at this concentration was extended for a month, resulting in no signs of disease on host plants [11]. Oligomycin A was found to be the most active anti-filamentous fungi analogue among antibiotics in the oligomycin family [1, 61, 62]. Since oligomycin F is the immunosuppressive homolog of oligomycin A [3] and oligomycin B is a stable natural product [63], these macrolides might be the leading compounds for the production of agrochemicals against the cereal killer *MoT*.

The morphological changes seen by these macrolides in *MoT* are also linked to several active, selective and cell-permeable antifungal secondary metabolites, like chelerythrine chloride, staurosporin, polyoxin A, polyoxin B and polyoxin D. Chelerythrine chloride and staurosporin

are inhibitors of protein kinase C that have induced swelling of hyphal subapical areas, inhibited spore germination, and inhibited the formation of appressoria of plant pathogenic fungi by blocking ATP binding to kinase [64-67]. Polyoxins are well-known as inhibitors of cell wall biosynthesis that suppress the formation of germ tubes and appressoria [41, 68-70]. The findings of this research were also comparable to the activities of several commercially available fungicides such as blasticidin-S, kasugamycin, streptomycin and tricyclazole, which demonstrated strong antifungal efficacy against many phytopathogenic fungi, like rice blast fungus *M. oryzae* *Oryzae* (*MoO*) [11, 71-73]. This study for the first time showed that two secondary metabolites of *Streptomyces* spp. were used to suppress the wheat blast disease. The typical mode of action of these fungicides are the inhibition of protein synthesis, microcondrial ATPase, cell wall biosynthesis and melanin biosynthesis, resulting in the inhibition of fungal mycelial growth, germination of spore and formation of appressoria.

Nowadays, the increase in resistance to fungicides among pathogenic micro-organisms is an alarming problem in agriculture. Non-rational application of commercial fungicides with site-specific modes of action, like strobilurin (QoI) and triazole, has resulted in the widespread dissemination of several resistant mutant species in *MoT* [27, 28]. The most concerning antifungal resistance problem of conventional fungicides contributes to a search for new, effective antifungal agents to protect wheat plants against this dangerous phytopathogenic fungus. The macrolides, oligomycin B and F have a comparatively higher bioactivity compared to commercial fungicide Nativo ® WG75. The inhibitory ability of these macrolides will allow them to be considered as candidate agrochemicals with a novel mode of action against the notorious wheat blast fungus.



# Conclusion

Our findings for the first time, have shown that the two macrolides, oligomycin B and F from *Streptomyces* spp., suppressed hyphal growth and asexual development of *MoT* fungus, and inhibited wheat blast disease development in detached leaves of wheat. Field assessment of these macrolides is required to evaluate these metabolites as effective fungicides against wheat blast disease. Further research is also required to understand the mode of action and the structure-activity relations among oligomycins A-G towards a devastating wheat killer, *M. oryzae* *Triticum*.

# Funding

This work was funded by the Krishi Gobeshona Foundation (KGF), Bangladesh through a coordinated project No. KGF TF 50-C/17 to Tofazzal Islam of the Institute of Biotechnology and Genetic Engineering of BSMRAU, Bangladesh.

# Conflict of Interest Statement

The authors declare that there is no conflict of interest.

# Ethics statement

There is no ethical issues in the experiment of this manuscript.

# Author contributions

**Conceptualization:** Tofazzal Islam

**Data curation:** Tofazzal Islam

**Formal analysis:** Moutoshi Chakraborty, Nur Uddin Mahmud

**Investigation:** Moutoshi Chakraborty, Nur Uddin Mahmud

**Resources:** Moutoshi Chakraborty, Nur Uddin Mahmud, Abu Naim Md. Muzahid, S. M. Fajle Rabby

**Methodology:** Moutoshi Chakraborty, Nur Uddin Mahmud, Abu Naim Md. Muzahid, S. M. Fajle Rabby

**Project administration:** Tofazzal Islam

**Software:** Moutoshi Chakraborty, Nur Uddin Mahmud

**Supervision:** Tofazzal Islam

**Funding acquisition:** Tofazzal Islam

**Visualization:** Tofazzal Islam

**Validation:** Tofazzal Islam.

**Writing – original draft:** Moutoshi Chakraborty, Nur Uddin Mahmud

**Writing – review & editing:** Tofazzal Islam

## Acknowledgements

The authors are thankful to the Krishi Gobeshona Foundation (KGF), Bangladesh (KGF-TF 50-C/17) for funding this work. The funders had no role in study design, data collection and analysis, decision to publish, or preparation of the manuscript. The authors are also thankful to Dr. Hartmut Laatsch of Georg-August University Goettingen, Germany, for kindly providing the oligomycins for this research.

## References

1. Masamune S, Sehgal JM, van Tamelen, EE, Strong FM, Peterson WH. Separation and preliminary characterization of oligomycins A, B and C. J Am Chem Soc. 1958; 80: 6092–95. doi: 10.1021/ja01555a049
2. Yamazaki M, Yamashita T, Harada T, Nishikiori T, Saito S, Shimada N, Fujii, A. 44-homooligomycins A and B, new antitumor antibiotics from *Streptomyces bottropensis*

producing organism, fermentation, isolation, structure elucidation and biological properties. J Antibiot. 1992; 45: 171–79. doi: 10.7164/antibiotics.45.171

3. Laatsch H, Kellner M, Wolf G, Lee YS, Hansske F, Konetschny-Rapp S, et al. Oligomycin F, a new immunosuppressive homologue of oligomycin A. J Antibiot. 1993; 46: 1334–41. doi: 10.7164/antibiotics.46.1334

4. Dame ZT, Islam MT, Helmke E, von Tiedemann A, Laatsch H. Oligomycins and pamamycin homologs impair motility and induce lysis of zoospores of the grapevine downy mildew pathogen, *Plasmopara viticola*. FEMS Microbiol. Lett. 2016; 363(16) fnw167: 1-6. doi: 10.1093/femsle/fnw167

5. Newitt JT, Prudence SMM, Hutchings MI, Worsley SF. Biocontrol of cereal crop diseases using *Streptomyces*. Pathogens. 2019; 8: 78. doi: 3390/pathogens8020078.

6. Ōmura, S. Microbial metabolites: 45 years of wandering, wondering and discovering. Tetrahedron. 2011; 67 (35): 6420–59. doi: 10.1016/j.tet.2011.03.117

7. Enomoto Y, Shiomi K, Matsumoto A, Takahashi Y, Iwai, Y, Harder A, et al. Isolation of a new antibiotic oligomycin G produced by *Streptomyces* sp. WK-6150. J Antibiot. 2001, 54: 308–13. doi: 10.7164/antibiotics.54.308

8. Salomon AR, Voehringer DW, Herzenberg LA, Khosla C. Apoptolidin, a selective cytotoxic agent, is an inhibitor of F0F1-ATPase. Chem Biol. 2001; 8: 71–80. doi: 10.1016/S1074-5521(00)00057-0

9. Kobayashi K, Nishino C, Ohya J, Sato S, Mikawa T, Shiobara Y, et al. Oligomycin E, a new antitumor antibiotic produced by *Streptomyces* sp. MCI-2225. J Antibiot. 1987; 40, 1053–57. doi: 10.7164/antibiotics.40.1053

10. Shin YK, Yoo BC, Chang HJ, Jeon E, Hong SH, Jung MS, et al. Down-regulation of mitochondrial F1F0-ATP synthase in human colon cancer cells with induced 5-fluorouracil resistance. *Cancer Res.* 2005; 65(8): 3162-70. doi: 10.1158/0008-5472.CAN-04-3300
11. Kim BS, Moon SS, Hwang BK. Isolation, identification, and antifungal activity of a macrolide antibiotic, oligomycin A, produced by *Streptomyces libani*. *Can J Bot.* 1999; 77: 850–58. doi: 10.1139/b99-044
12. Igarashi S, Utiamada CM, Igarashi LC, Kazuma AH, Lopes RS. *Pyricularia* in Brazil. 1. Ocorrência de *Pyricularia* sp. no estado do Paraná. *Fitopatol. Bras.* 1986; 11: 351–52.
13. Kohli MM, Mehta YR, Guzman E, Viedma L, Cubilla LE. *Pyricularia* blast-a threat to wheat cultivation. *Czech J Genet Plant Breed.* 2011; 47: 130-34.
14. Islam MT, Croll D, Gladieux P, Soanes DM, Persoons A, Bhattacharjee P, et al., Emergence of wheat blast in Bangladesh was caused by a South American lineage of *Magnaporthe oryzae*. *BMC Biol.* 2016; 14, 84. doi: 10.1186/s12915-016-0309-7
15. Islam MT, Kim KH, Choi J. Wheat blast in Bangladesh: the current situation and future impacts. *Plant Pathol.. J.* 2019; 35(1): 1–10. doi: 10.5423/PPJ.RW.08.2018.0168
16. Tufan HA, McGrann GRD, Magusin A, Morel JB, Miche L, Boyd LA. Wheat blast: histopathology and transcriptome reprogramming in response to adapted and nonadapted *Magnaporthe* isolates. *New Phytol.* 2009; 184(2): 473-84.
17. Ceresini PC, Castroagudín VL, Rodríguez FA, Rios JA, Aucique-Pérez CE, Moreira SI, et al. Wheat blast: from its origin in South America to its emergence as a global threat. *Mol Plant Pathol.* 2019; 20(2): 155-72. doi: 10.1111/mpp.12747

18. Wilson RA, Talbot NJ. Under pressure: investigating the biology of plant infection by *Magnaporthe oryzae*. Nat Rev Microbiol. 2009; 7(3): 185–95. doi:10.1038/nrmicro2032.
19. Inoue K, Suzuki T, Ikeda K, Jiang S, Hosogi N, Hyon GS, et al. Extracellular matrix of *Magnaporthe oryzae* may have a role in host adhesion during fungal penetration and is digested by matrix metalloproteinases. J Gen Plant Pathol. 2007; 73: 388–98. doi: 10.1007/s10327-007-0048-2
20. Urashima AS, Hashimoto Y, Le Don D, Kusaba M, Tosa Y, Nakayashiki, et al. Molecular analysis of the wheat blast population in Brazil with a homolog of retrotransposon MGR583. Jpn J Phytopathol. 1999; 65: 429–36. doi: 10.3186/jjphytopath.65.429
21. Chakraborty M, Mahmud NU, Gupta DR, Tareq FS, Shin HJ, Islam T. Inhibitory effects of linear lipopeptides from a marine *Bacillus subtilis* on the wheat blast fungus *Magnaporthe oryzae* *Triticum*. Front Microbiol. 2020; 11(665): 1-14. doi: 10.3389/fmicb.2020.00665
22. Callaway E. Devastating wheat fungus appears in Asia for first time. Nature. 2016; 532: 421-422. doi: 10.1038/532421a
23. CIMMYT. Wheat Blast Disease: A Deadly and Baffling Fungal Foe. International Maize and Wheat Improvement Center; Texcoco, Mexico. 2016.
24. Mundi. Agricultural production, supply, and distribution: wheat production by country in 1000 MT. 2016.
25. Nannipieri P. The potential use of soil enzymes as indicators of productivity, sustainability and pollution. In Soil biota-management in sustainable farming systems;

Pankhurst, C. E., Doube, B. M., Gupta, V. V. S. R., Grace, P. R., Eds.; CSIRO: Collingwood, Australia, 1994; pp 33–140.

26. Suprapta DN. Potential of microbial antagonists as bio-control agents against plant pathogens. J ISSAAS. 2012; 18: 1–8.

27. Castroagudín VL, Ceresini PC, De Oliveira SC, Reges JTA, Maciel JLN, Bonato ALV, et al. Resistance to QoI fungicides is widespread in Brazilian populations of the wheat blast pathogen *Magnaporthe oryzae*. Phytopathology 2015; 105: 284–94. doi: 10.1094/PHYTO-06-14-0184-R

28. Dorigan AF, Carvalho GD, Poloni NM, Negrisoli MM, Maciel JLN, Ceresini PC. Resistance to triazole fungicides in *Pyricularia* species associated with invasive plants from wheat fields in Brazil. Acta Sci Agron. 2019; 41(1): 39332. doi: 10.4025/actasciagron. v41i1.39332

29. Urashima AS, Igarashi S, Kato H. Host range, mating type, and fertility of *Pyricularia grisea* from wheat in Brazil. Plant Dis. 1993; 77(12): 1211-16. doi: 10.1094/PD-77-1211

30. He Y, Zhu M, Huang J, Hsiang T, Zheng L. Biocontrol potential of a *Bacillus subtilis* strain BJ-1 against the rice blast fungus *Magnaporthe oryzae*. Can J Plant Pathol. 2019; 41(1): 47-59. doi: 10.1080/07060661.2018.1564792

31. Bauer AW, Kirby WM, Sherris JC, Turck M. Antibiotic susceptibility testing by a standardized single disk method. Am J Clin Pathol. 1966; 45(4): 493–96. doi: 10.1093/ajcp/45.4\_ts.493

32. Riungu GM, Muthorni JW, Narla RD, Wagacha JM, Gathumbi JK. Management of *Fusarium* head blight of wheat and deoxynivalenol accumulation using antagonistic microorganisms. Plant Pathol. J. 2008; 7: 13-9. doi: 10.3923/ppj.200

33. Islam MT, von Tiedemann A. 2,4-Diacetylphloroglucinol suppresses zoosporogenesis and impairs motility of Peronosporomycete zoospores. *World J Microb Biot.* 2011; 27(9): 2071–79. doi: 10.1007/s11274-011-0669-7
34. Romero D, de Vicente A, Olmos JL, Davila JC, Perez-Garcia A. Effect of lipopeptides of antagonistic strains of *Bacillus subtilis* on the morphology and ultrastructure of the cucurbit fungal pathogen *Podosphaera fusca*. *J Appl Microbiol.* 2007; 103: 969–76. doi: 10.1111/j.1365-2672.2007.03323.x
35. Kopecká M, Ilkovic L, Ramíková V, Yamaguchi M. Effect of cytoskeleton inhibitors on conidiogenesis and capsule in the long neck yeast *Fellomyces* examined by scanning electron microscopy. *Chemo.* 2010; 56(3): 197–202. doi: 10.1159/000316330
36. Tang QY, Bie XM, Lu ZX, Lv FX, Tao Y, Qu XX. Effects of fengycin from *Bacillus subtilis* fmbJ on apoptosis and necrosis in *Rhizopus stolonifer*. *J Microbiol.* 2014; 2: 675–680. doi: 10.1007/s12275-014-3605-3
37. Gond SK, Bergen MS, Torres MS, White JF Jr. Endophytic *Bacillus* spp. produce antifungal lipopeptides and induce host defence gene expression in maize. *Microbiol Res.* 2015; 172: 79–87. doi: 10.1016/j.micres.2014.11.004
38. Liao JH, Chen PY, Yang YL, Kan SC, Hsieh FC, Liu YC. Clarification of the antagonistic effect of the lipopeptides produced by *Bacillus amyloliquefaciens* BPD1 against *Pyricularia oryzae* via In Situ MALDI-TOF IMS Analysis. *Molecules* 2016; 21(12): 1670. doi: 10.3390/molecules21121670
39. Zhang L, Sun C. Fengycins, cyclic lipopeptides from marine *Bacillus subtilis* strains, kill the plant-pathogenic fungus *Magnaporthe grisea* by inducing reactive oxygen species

production and chromatin condensation. Appl Environ Microbiol. 2018; 84: e00445-18.

doi: 10.1128/AEM.00445-18

40. Jastroch M, Divakaruni AS, Mookerjee S, Treberg JR, Brand MD. Mitochondrial proton and electron leaks. Essays Biochem. 2010; 47(1): 53–67. doi: 10.1042/ bse0470053

41. Isono K, Nagatsu J, Kawashima Y, Suzuki S. Studies on polyoxins, antifungal antibiotics. Agric Biol Chem. 1965; 29(9): 848–54. doi: 10.1080/00021369.1965.10858475

42. Nielsen TH, Thrane C, Christophersen C, Anthoni U, Sørensen J. Structure, production characteristics and fungal antagonism of tensin – a new antifungal cyclic lipopeptide from *Pseudomonas fluorescens* strain 96.578. J Appl Microbiol. 2000; 89: 992-1001. doi: 10.1046/j.1365-2672.2000.01201.x

43. Islam MT, Hashidoko Y, Deora A, Ito T, Tahara S. Suppression of damping-off disease in host plants by the rhizoplane bacterium *Lysobacter* sp. strain SB-K88 is linked to plant colonization and antibiosis against soilborne Peronosporomycetes. Appl Environ Microb. 2005; 71: 3786–3796. doi: 10.1128/AEM.71.7.3786-3796.2005

44. Islam MT. Disruption of ultrastructure and cytoskeletal network is involved with biocontrol of damping-off pathogen *Aphanomyces cochlioides* by *Lysobacter* sp. strain SB-K88. Biol Control 2008; 46: 312–21. <https://doi.org/10.1016/j.biocontrol.2008.02.006>

45. Islam MT. Mode of antagonism of a biocontrol bacterium *Lysobacter* sp. SB-K88 toward a damping-off pathogen *Aphanomyces cochlioides*. World J. Microb. Biot. 2010; 26: 629-37. doi: 10.1007/s11274-009-0216-y



46. Islam MT, Fukushi Y. Growth inhibition and excessive branching in *Aphanomyces cochlioides* induced by 2,4-diacetylphloroglucinol is linked to disruption of filamentous actin cytoskeleton in the hyphae. World J Microb Biot. 2010; 26: 1163-70. doi: 10.1007/s11274-009-0284-z
47. Ohara T. REN1 is required for development of microconidia and macroconidia, but not of Chlamydospores, in the plant pathogenic fungus *Fusarium oxysporum*. Genet. 2004; 166(1): 113–24. doi: 10.1534/genetics.166.1.113
48. Homma Y, Takahashi H, Arimoto Y. Studies on the mode of action of soybean lecithin. JJP. 1992; 58(4): 514-21. doi: 10.3186/jjphytopath.58.514
49. Carver TLW, Roberts PC, Thomas BJ, Lyngkær MF. Inhibition of *Blumeria graminis* germination and germling development within colonies of oat mildew. Physiol Mol Plant Pathol. 2001; 58(5): 209–28. doi:10.1006/pmpp.2001.0330
50. Hall AA, Gurr SJ. Initiation of appressorial germ tube differentiation and appressorial hooking: distinct morphological events regulated by cAMP-signalling in *Blumeria graminis* f. sp. *hordei*. Physiol Mol Plant Pathol. 2000; 56: 39-46. doi: 10.1006/pmpp.1999.0246
51. Neupane P, Bhujju S, Thapa N, Bhattarai HK. ATP Synthase: Structure, Function and Inhibition. Biomol Con. 2019; 10(1): 1–10. doi: 10.1515/bmc-2019-0001
52. Smith RM, Peterson WH, McCoy E. Oligomycin, a new antifungal antibiotic. Antibiot Chemother. 1954; 4: 962–70.
53. Pagliarani A, Sesci S, Ventrella V. Modifiers of the oligomycin sensitivity of the mitochondrial F1F0-ATPase. Mitochondrion 2013; 13: 312–19. doi: 10.1016/j.mito.2013.04.005

54. Alekseeva MG, Elizarov SM, Bekker OB, Lubimova IK, Danilenko VN. F0F1ATP synthase of streptomycetes: modulation of activity and oligomycin resistance by protein Ser/Thr kinases. Biol Membrany. 2009; 26: 41–9. doi: 10.1134/ S1990747809010036
55. Li YC, Fung KP, Kwok TT, Lee CY, Suen YK, Kong SK. Mitochondria-targeting drug oligomycin blocked P-glycoprotein activity and triggered apoptosis in doxorubicin-resistant HepG2 Cells. Chemotherapy 2004; 50: 55–62. doi: 10.1159/000077803
56. Lysenkova LN, Turchin KF, Danilenko VN, Korolev AM, Preobrazhenskaya MN. The first examples of chemical modification of oligomycin A. J Antibiot. 2009; 63(1): 17–22. doi: 10.1038/ja.2009.112
57. Bimpong CE. Changes in metabolic reserves and enzyme activities during zoospore motility and cyst germination in *Phytophthora palmivora*. Can J Bot. 1975; 53: 1411–16. doi: 10.1139/b75-170
58. IRRI. Standard Evaluation System for Rice. 4th Edn., International Rice Research Institute (IRRI), Los Banos, Philippines, 1996; Pages: 52.
59. Pring RJ. Effects of triadimefon on the ultrastructure of rust fungi infecting leaves of wheat and broad bean (*Vicia faba*). Pestic Biochem Phys. 1984; 21(1): 127–37.
60. Sauter H, Steglich W, Anke T. Strobilurins: evolution of a new class of active substances. Angew. Chem Int Ed Engl. 1999; 38: 1328-49. doi: 10.1002/(SICI)1521-3773(19990517)38:10<1328::AID-ANIE1328>3.0.CO;2-1
61. Marty EW, McCoy E. The chromatographic separation and biological properties of the oligomycins. Antibiot Chemother. 1959; 9: 286–93.

62. Sakagami Y, Ueda A, Yamabayashi S, Tsurumaki Y, Kumon S. A new antibiotic, hondamycin. I. Isolation and characterization. J Antibiot. 1969; 22: 521–27. doi: 10.7164/antibiotics.22.521
63. Lardy HA, Witonsky P, Johnson D. Antibiotics as tools for metabolic studies. IV. Comparative effectiveness of oligomycins A, B, C, and rutamycin as inhibitors of phosphoryl transfer reactions in mitochondria. Biochem. 1965; 4: 552–54.
64. Agae Y, Magae J. Effect of staurosporine on growth and hyphal morphology of *Pleurotus ostreatus*. J Gen Microbiol. 1993; 139: 161–64. doi: 10.1099/00221287-139-1-161
65. Penn TJ, Wood ME, Soanes DM, Csukai M, Corran AJ, Talbot NJ. Protein kinase C is essential for viability of the rice blast fungus *Magnaporthe oryzae*. Mol Microbiol. 2015; 98(3): 403–19. doi: 10.1111/mmi.13132
66. Wei Q, Zhao M, Li X. Extraction of chelerythrine and its effects on pathogenic fungus spore germination. Phcog Mag. 2017; 13; 600–606. doi: 10.4103/pm.pm\_545\_16
67. Sugahara A, Yoshimi A, Shoji F, Fujioka T, Kawai K, Umeyama H, et al. Novel antifungal compound Z-705 specifically inhibits protein kinase C of filamentous fungi. Appl Environ Microbiol. 2019; 85: e02923– e02918. doi: 10.1128/AEM.02923-18
68. Endo A, Kakiki K, Misato J. Mechanism of action of the antifungal agent polyoxin D. J Bacteriol. 1970; 104: 189–96.
69. Barka EA, Vatsa P, Sanchez L, Gaveau-Vaillant N, Jacquard C, Meier-Kolthoff JP, et al. Taxonomy, physiology, and natural products of actinobacteria. Microbiol Mol Biol Rev. 2016; 80: 1–43. <https://doi.org/10.1128/MMBR.00019-15>

772 70. Copping LG, Duke SO. Natural products that have been used commercially as crop  
773 protection agents. Pest Manag Sci. 2007; 63(6): 524–554. doi: 10.1002/ps.1378

774 71. Yamaguchi I. Fungicides for control of rice blast disease. J Pest Sci. 1982; 7: 307–16.

775 72. Woloshuk CP, Sisler HD, Vigil EL. Action of the antipenetrant, tricyclazole, on  
776 appressoria of *Pyricularia oryzae*. Physiol Plant Pathol. 1983; 22(2): 245–59. doi:  
777 10.1016/S0048-4059(83)81013-3

778 73. Magar PB, Acharya B, Pandey B. Use of chemical fungicides for the management of  
779 Rice Blast (*Pyricularia grisea*) disease at Jyotinagar, Chitwan, Nepal. Int J Appl Sci  
780 Biotechnol. 2015; 3(3): 474. doi: 10.3126/ijasbt.v3i3.13287

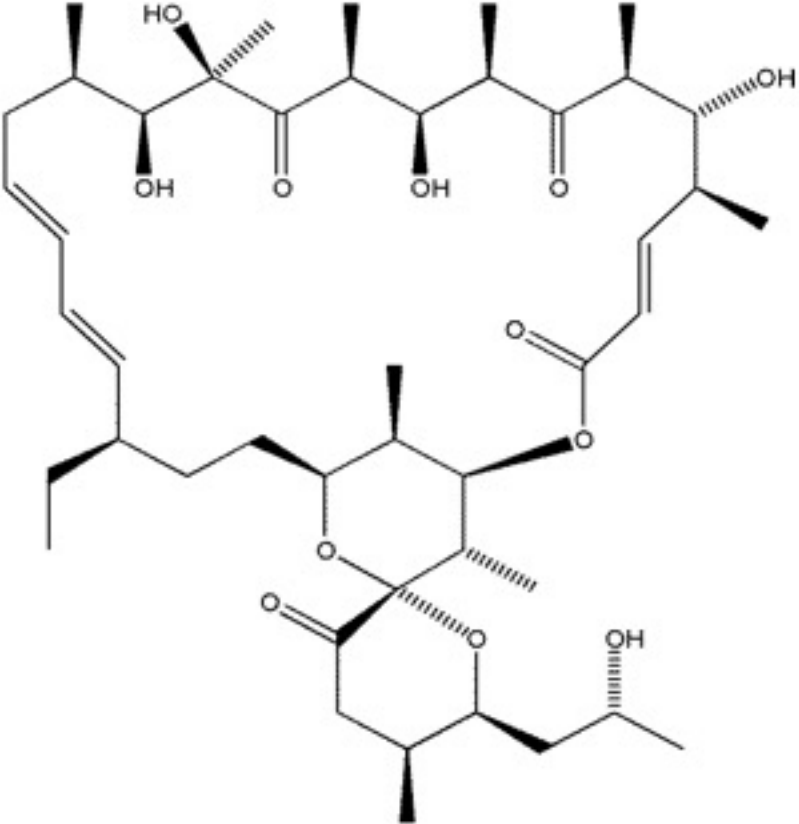

Oligomycin B

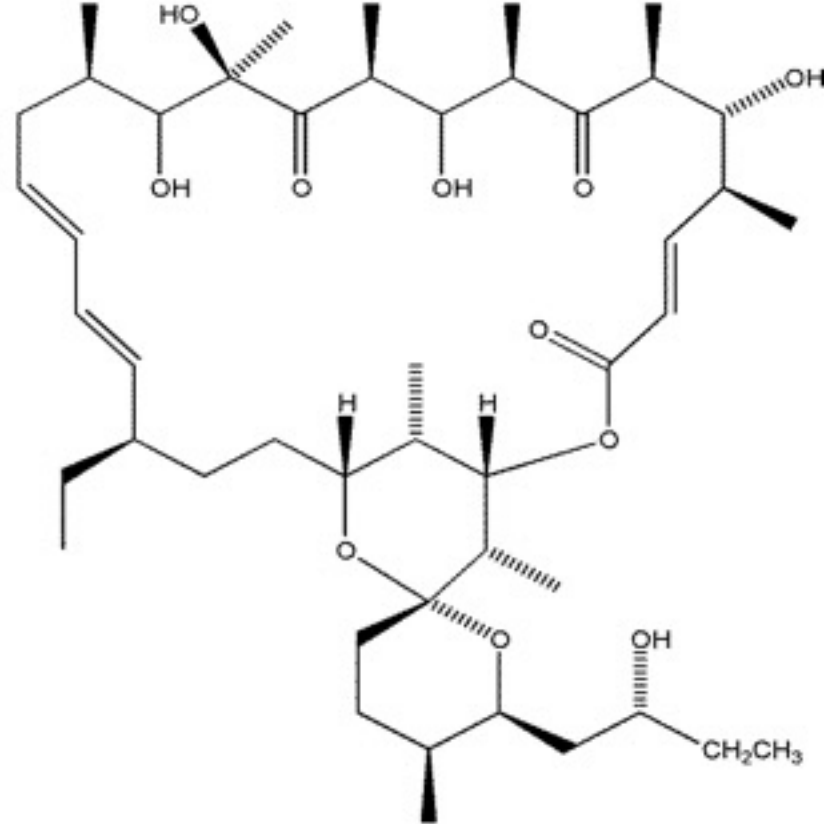

Oligomycin F

Figure 1

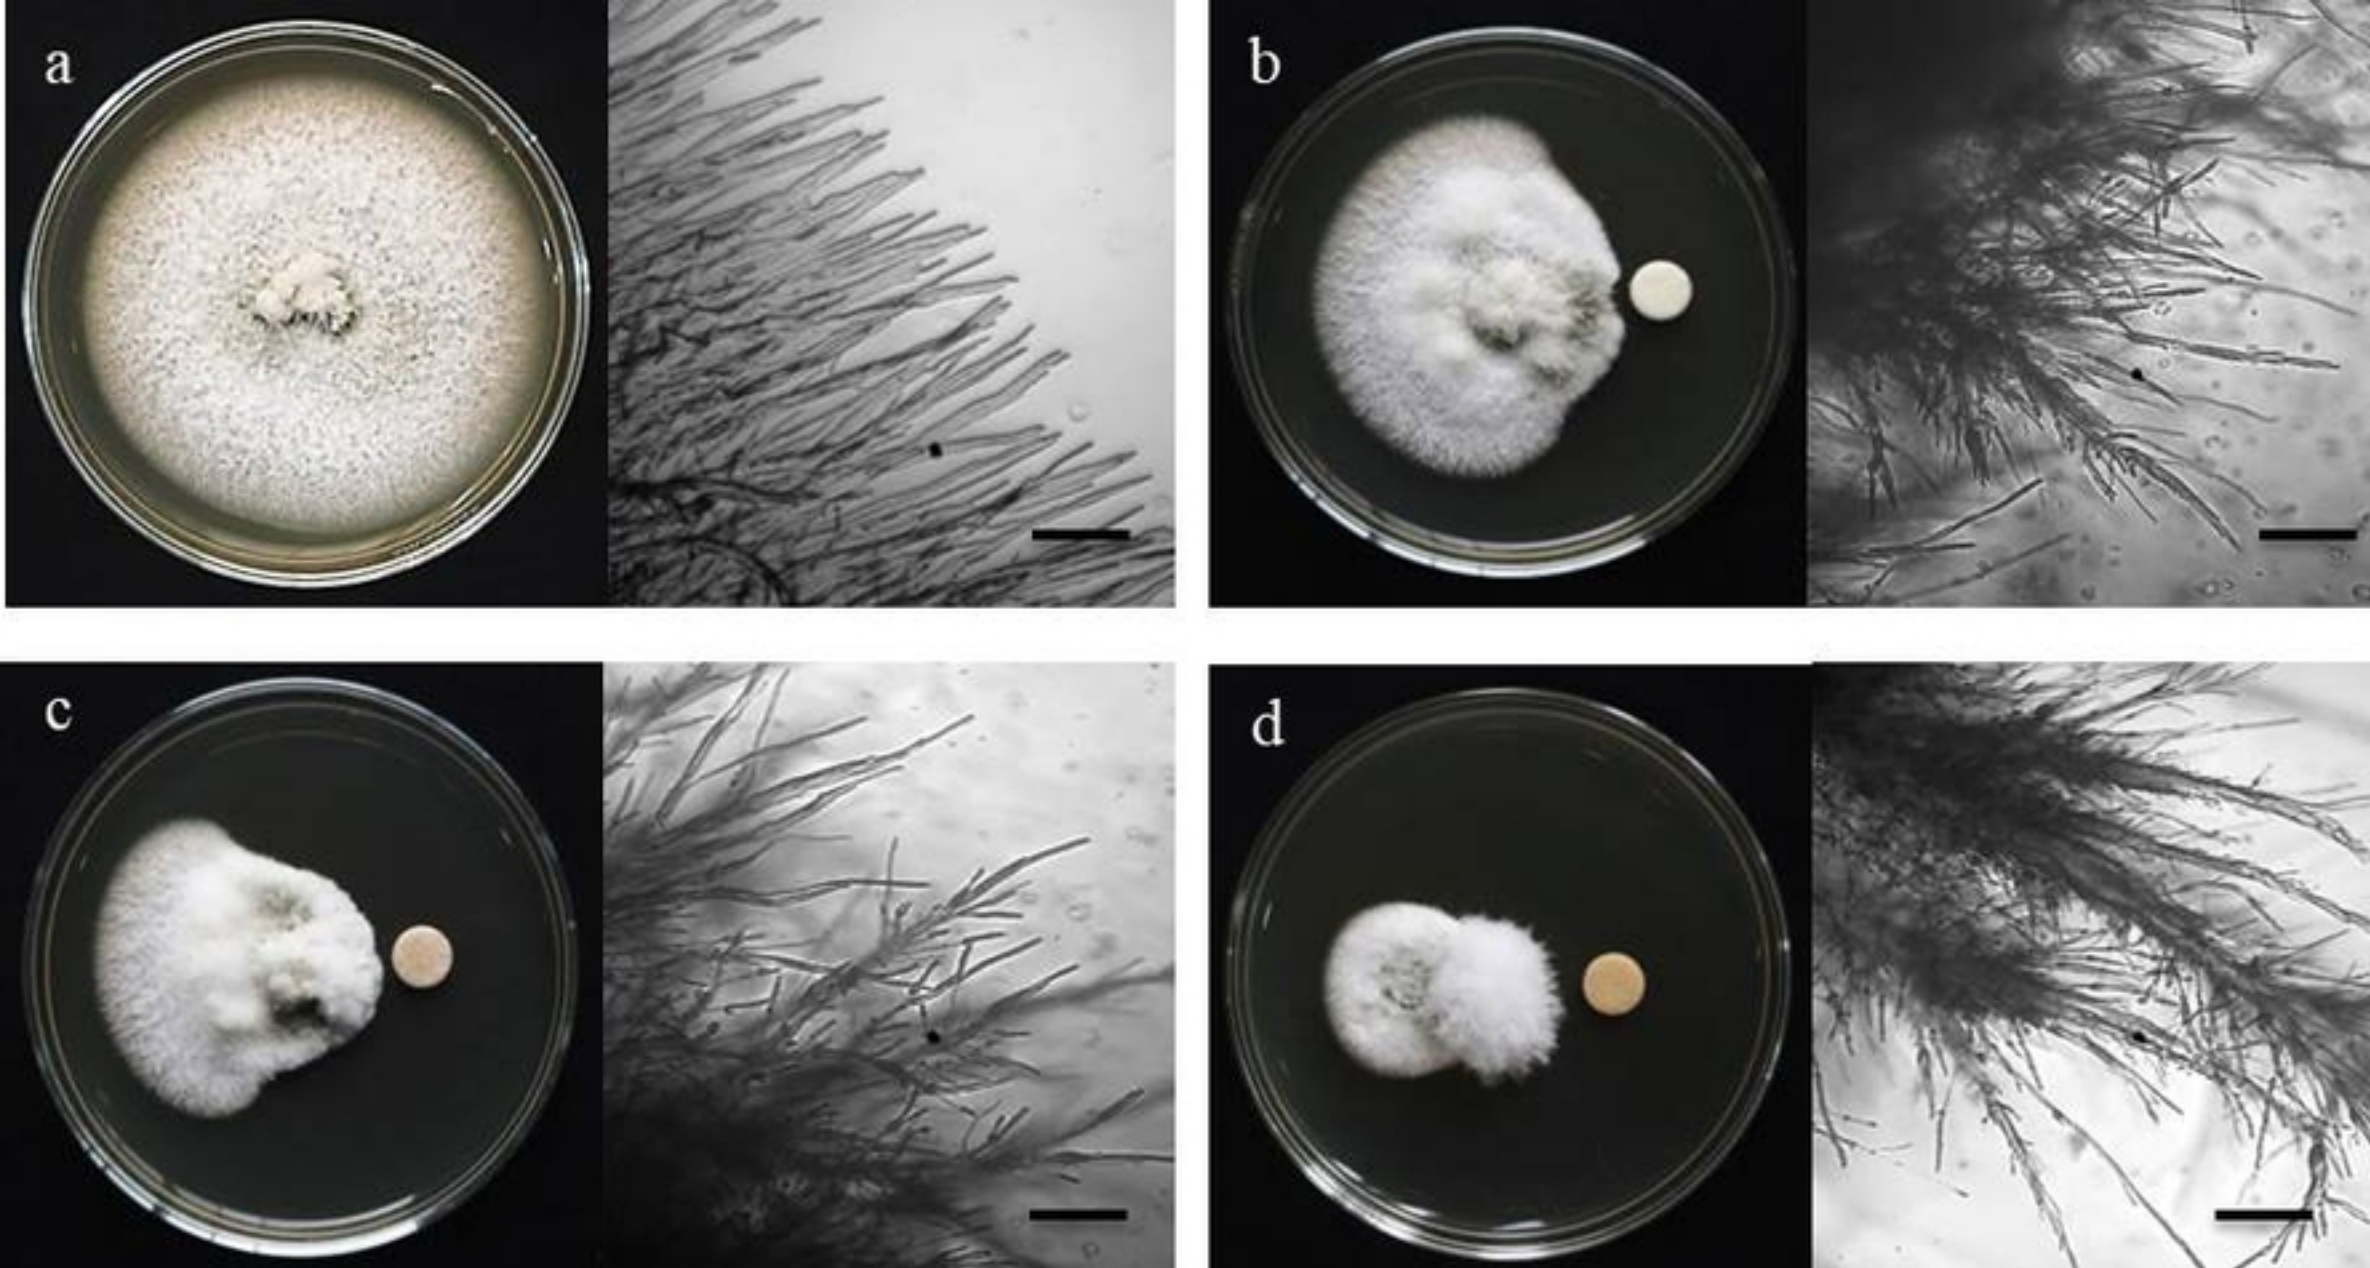

Figure 2

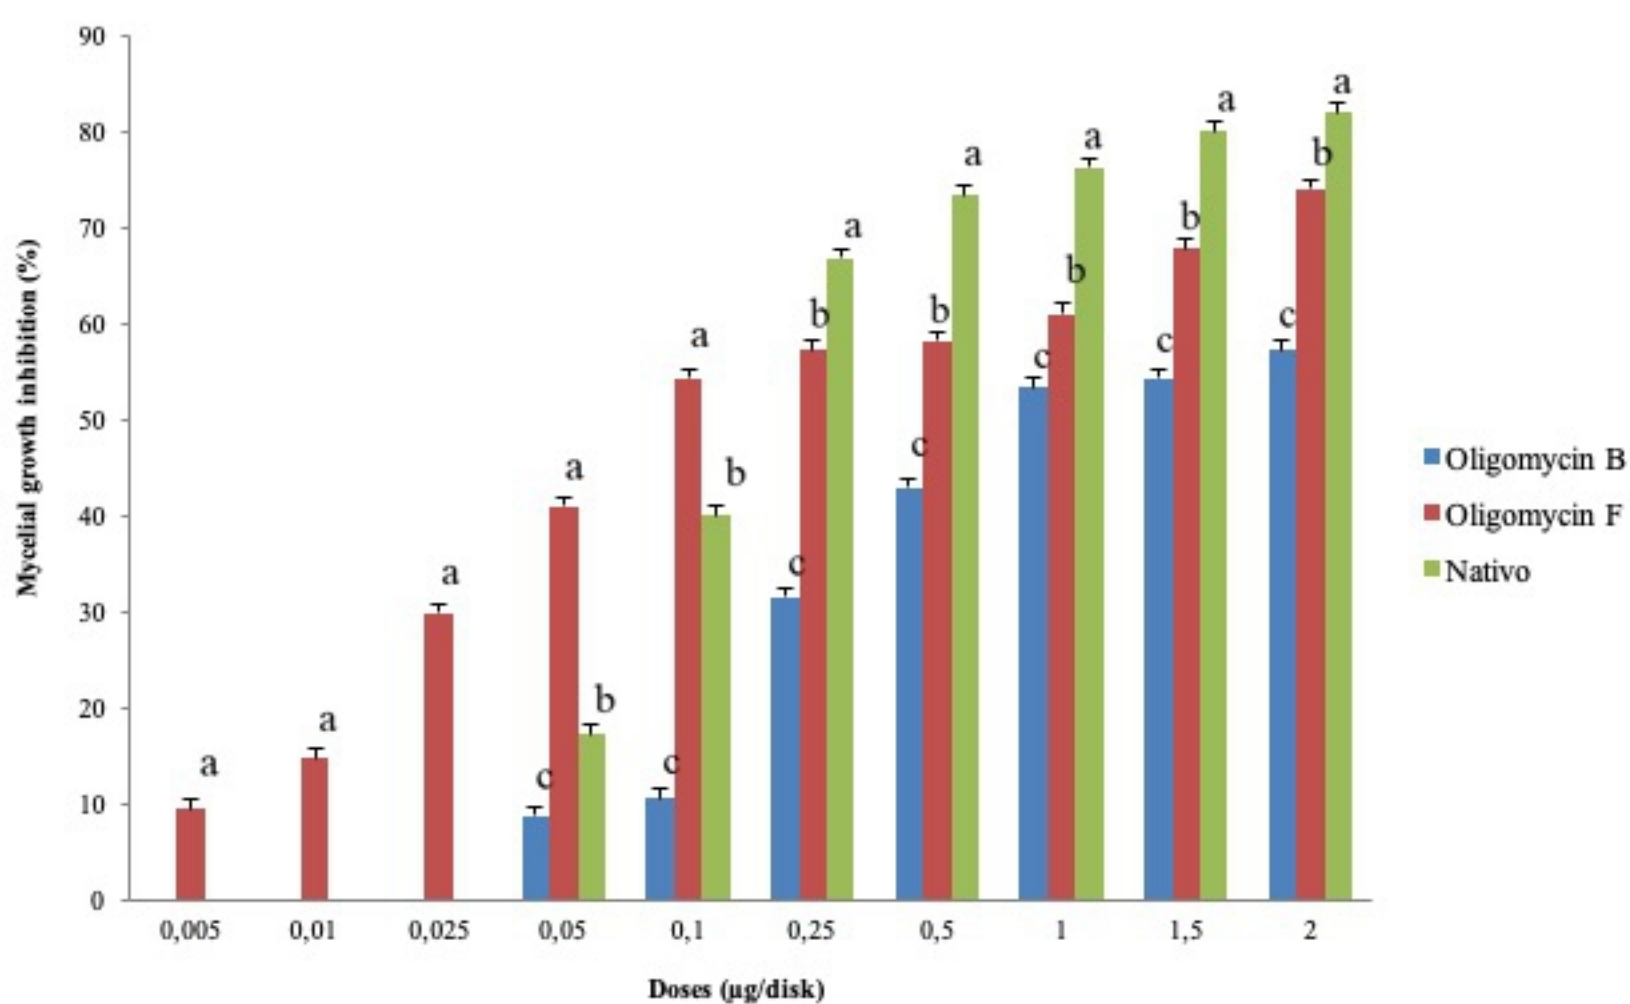

Figure 3

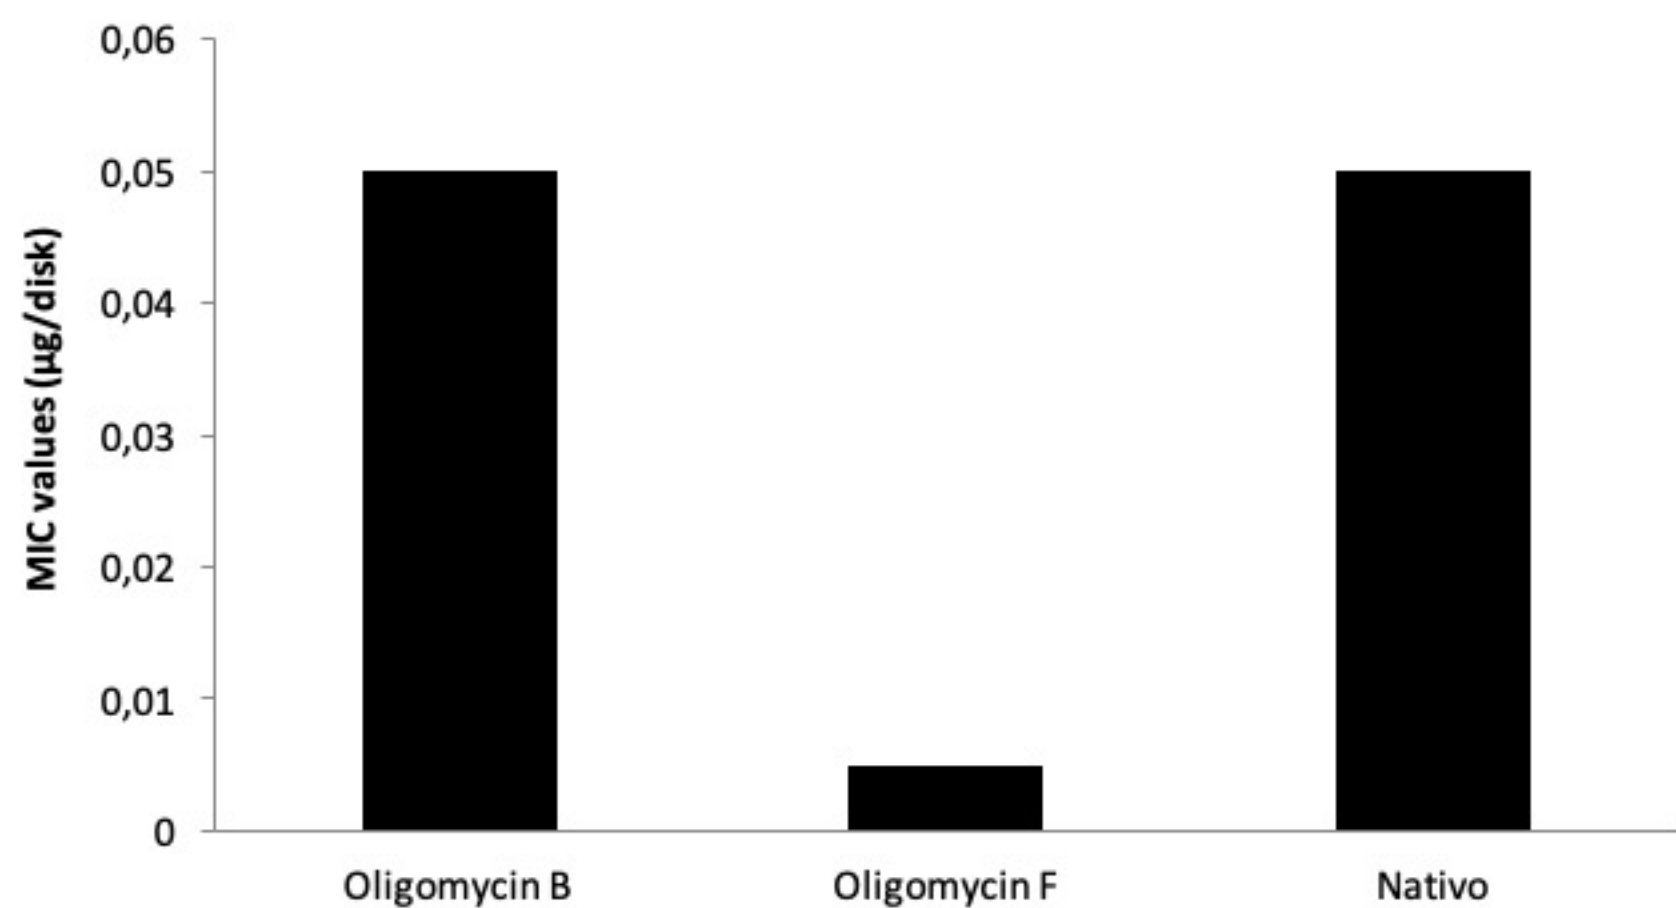

Figure 4



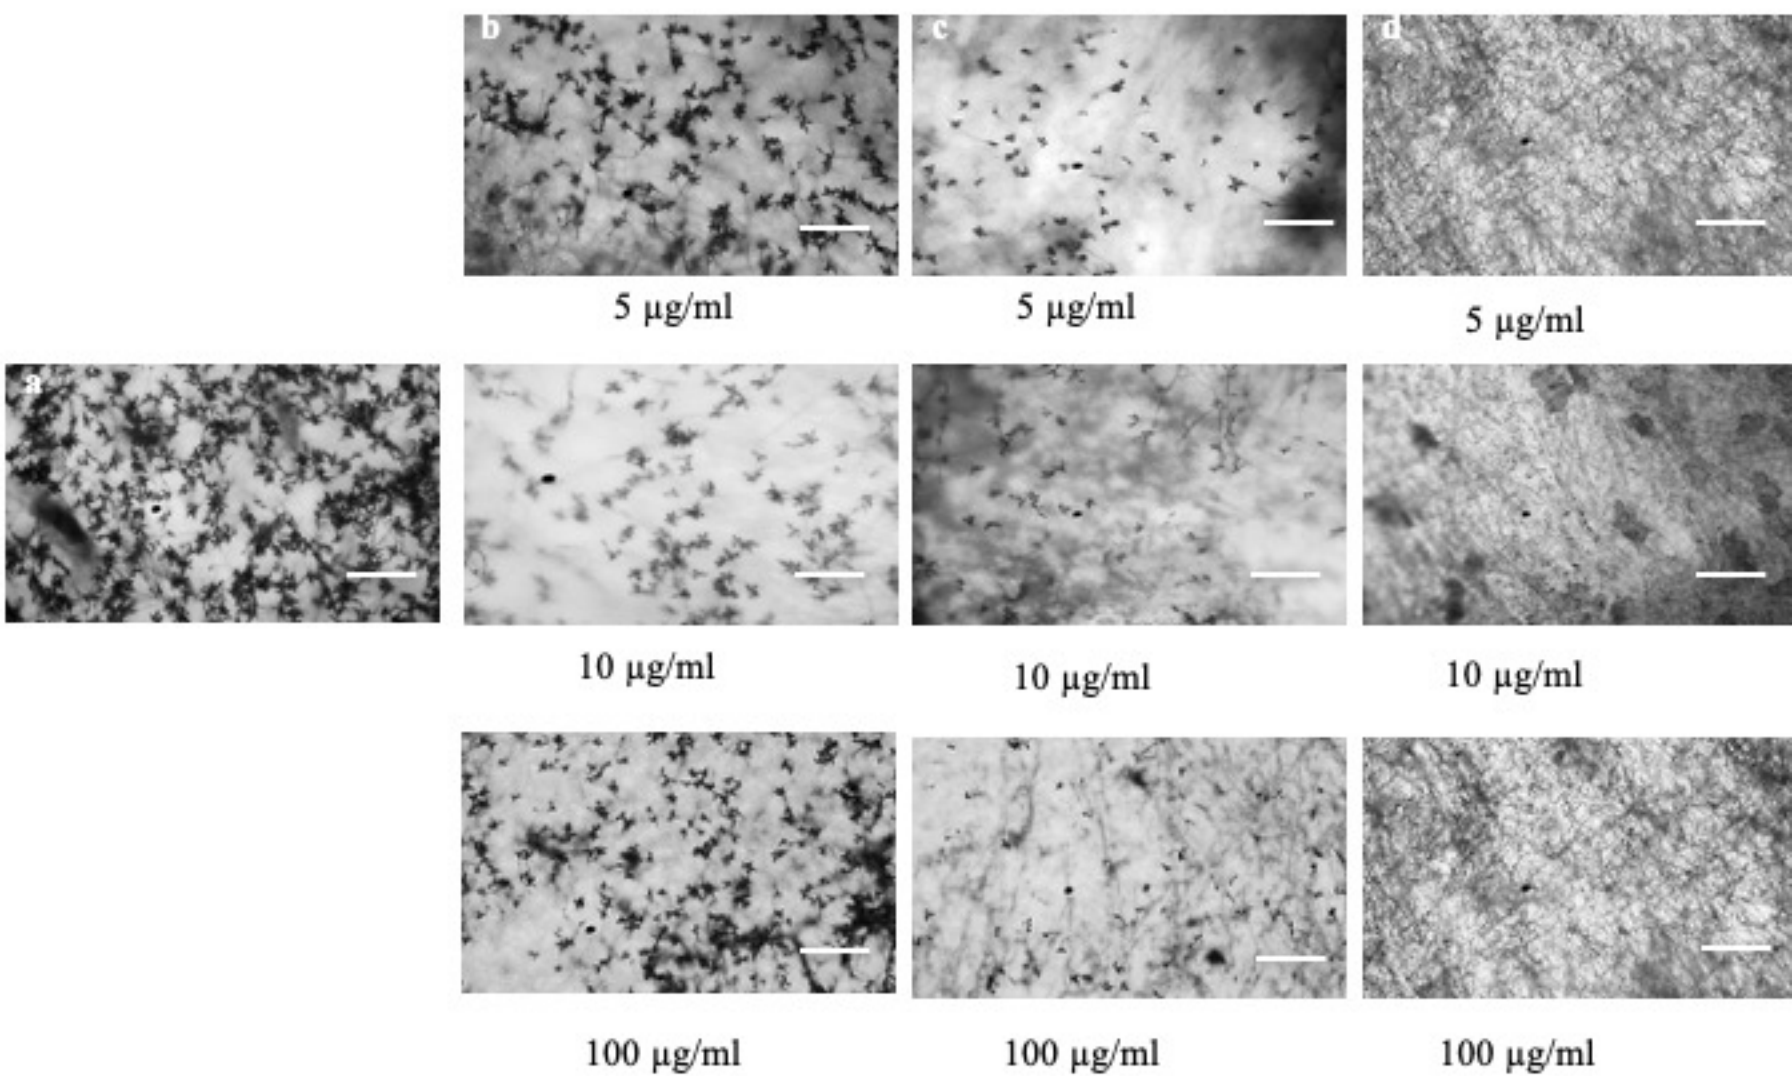

Figure 5

**0 Hour**

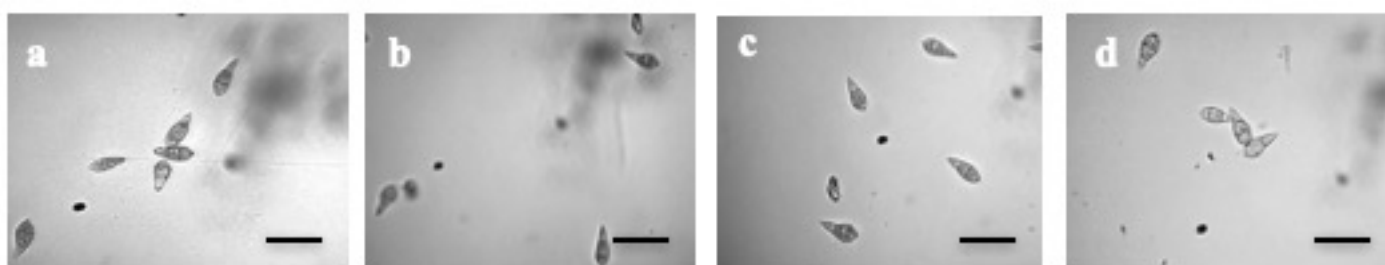

**6 Hour**

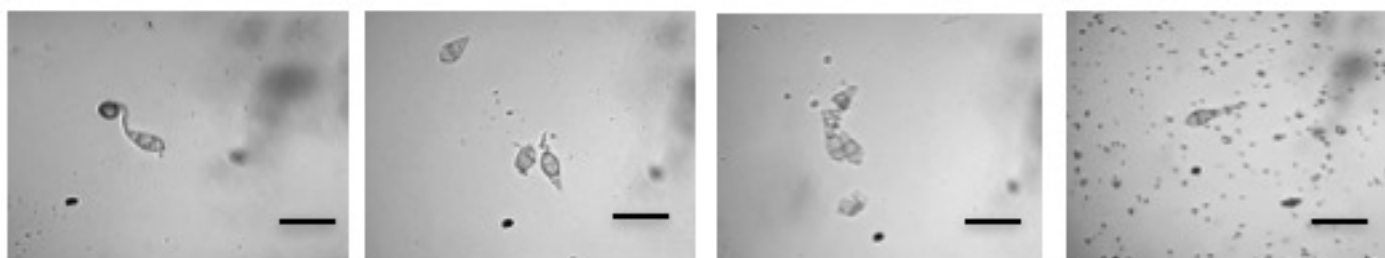

**12 Hour**

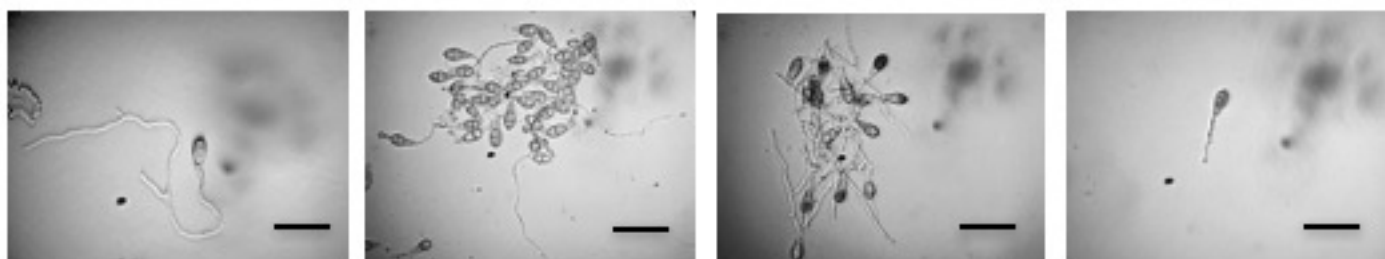

**24 Hour**

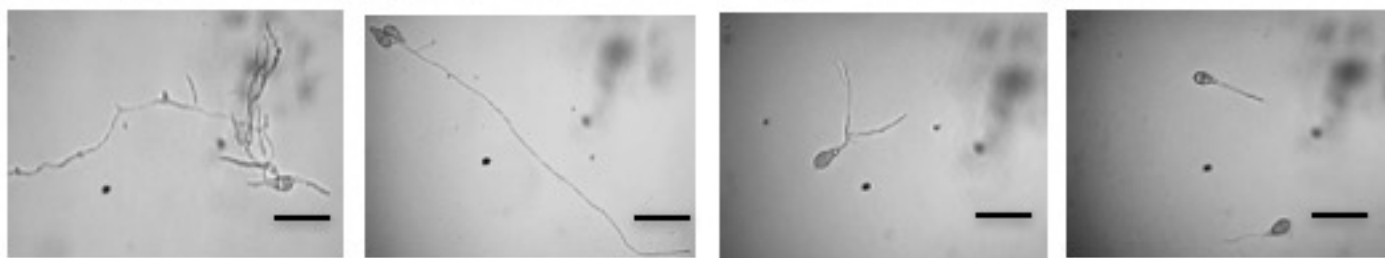

**Figure 6**

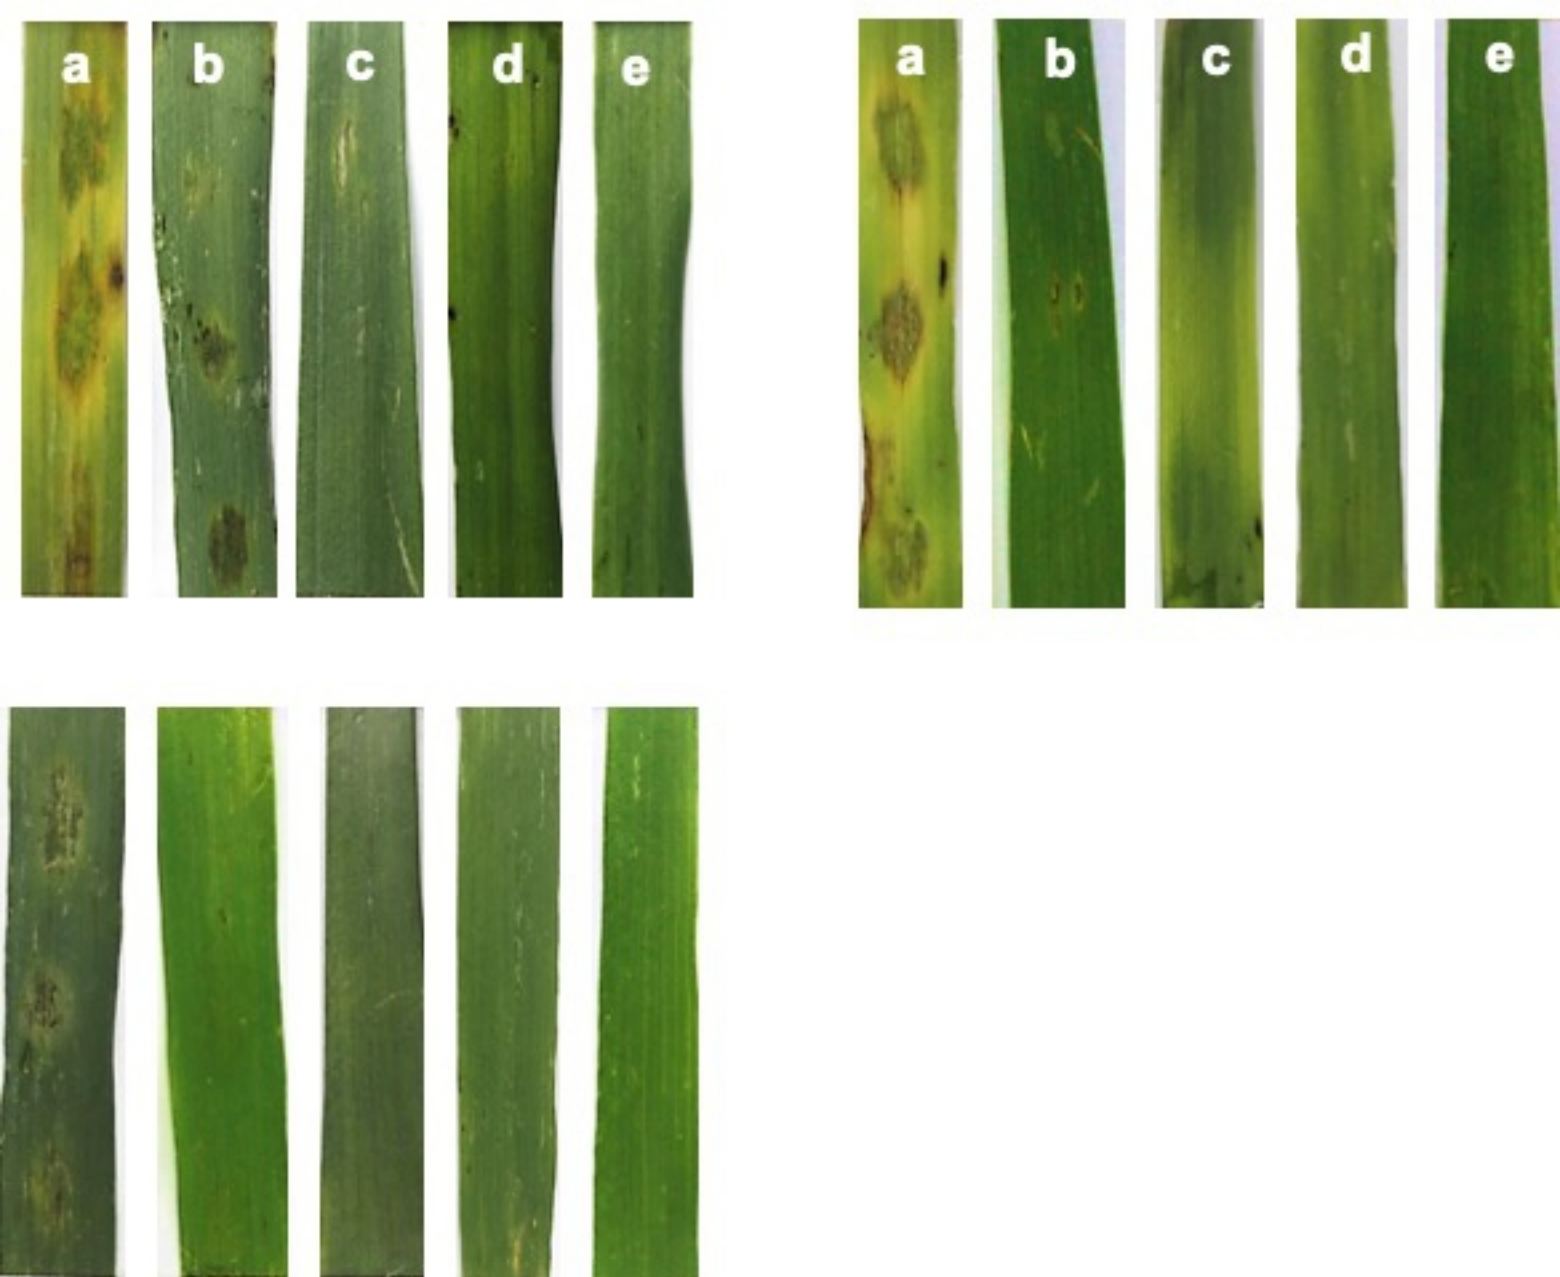

Figure 7A

(B)

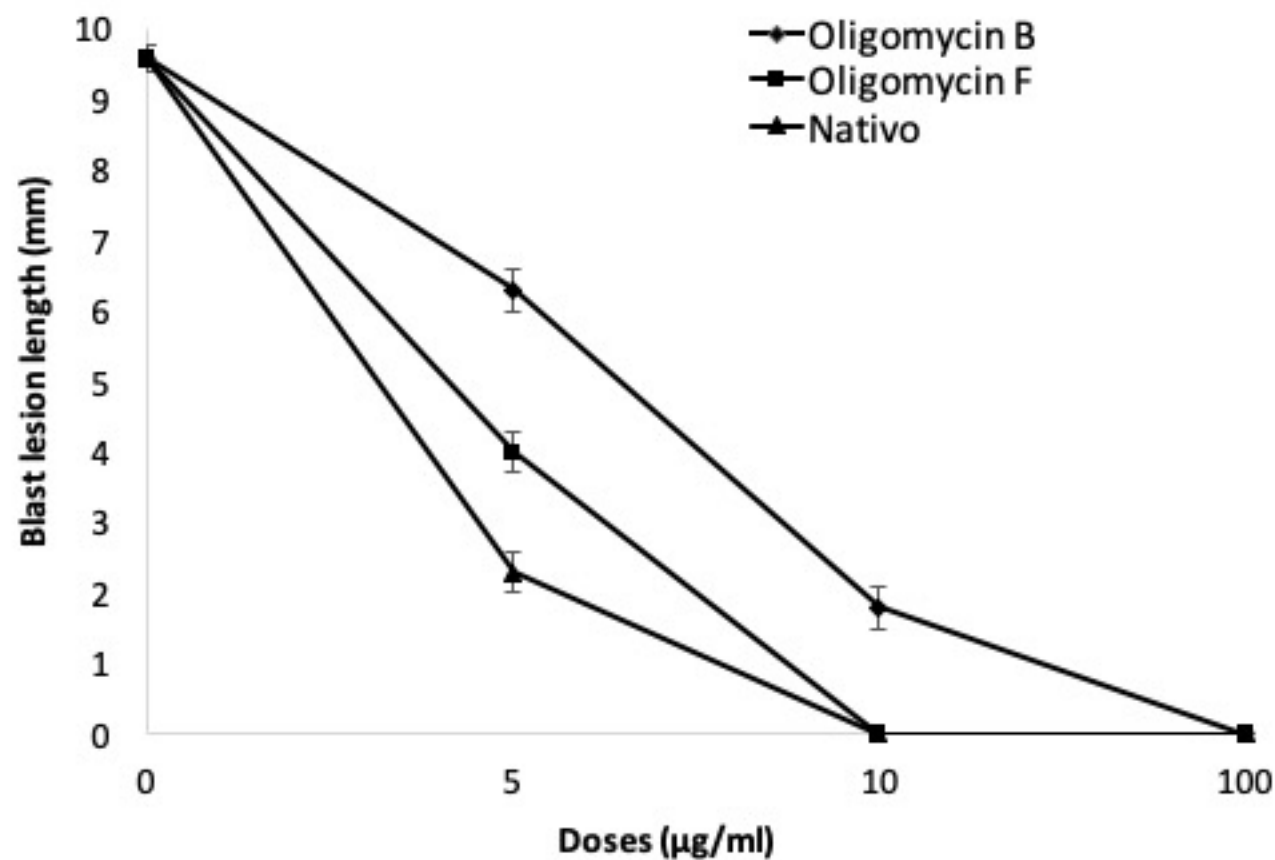

Figure 7B
